# Supplementary material for: Indolylbenzothiadiazoles as highly tunable fluorophores for imaging lipid droplet accumulation in astrocytes and glioblastoma cells
Source: Royal Society of Chemistry journal article supplement (doi:10.1039/d1ra04419b), 2021-01-01

## Supporting Information

# Indolylbenzothiadiazoles as highly tunable fluorophores for imaging lipid droplet accumulation in astrocytes and glioblastoma cells

Kilian Colas,<sup>1</sup> Karl O. Holmberg,<sup>2</sup> Linus Chiang,<sup>3</sup> Susanne Doloczki,<sup>1</sup> Fredrik J. Swartling<sup>2</sup> and Christine Dyrager<sup>1,\*</sup>

<sup>1</sup>Department of Chemistry - BMC, Uppsala University, SE-751 23 Uppsala, Sweden

<sup>2</sup>Department of Immunology, Genetics and Pathology, Science for Life Laboratory, Uppsala University, SE-751 85, Uppsala, Sweden

<sup>3</sup>Department of Chemistry, University of the Fraser Valley, BC V2S 7M8 Abbotsford, Canada

### Contents

|                                                                                                                                 |    |
|---------------------------------------------------------------------------------------------------------------------------------|----|
| General Information .....                                                                                                       | 3  |
| I – Synthetic procedures .....                                                                                                  | 6  |
| General procedure A for the Suzuki coupling reactions.....                                                                      | 6  |
| General procedure B for the Boc-deprotection of <i>N</i> -Boc-indole-BTD derivatives .....                                      | 6  |
| General procedure C for the <i>N</i> -functionalization of <i>N</i> -H-indole-BTD derivatives.....                              | 6  |
| 4-(1 <i>H</i> -indol-2-yl)benzo[ <i>c</i> ][1,2,5]thiadiazole ( <b>1</b> ).....                                                 | 7  |
| 4-(1-methyl-1 <i>H</i> -indol-2-yl)benzo[ <i>c</i> ][1,2,5]thiadiazole ( <b>2</b> ).....                                        | 7  |
| 4-(1-isopropyl-1 <i>H</i> -indol-2-yl)benzo[ <i>c</i> ][1,2,5]thiadiazole ( <b>3</b> ).....                                     | 7  |
| 1-(2-(benzo[ <i>c</i> ][1,2,5]thiadiazol-4-yl)-1 <i>H</i> -indol-1-yl)ethan-1-one ( <b>4</b> ).....                             | 8  |
| <i>N</i> -Boc-2-(benzo[ <i>c</i> ][1,2,5]thiadiazol-4-yl)-indole ( <b>5</b> ).....                                              | 8  |
| (2-(benzo[ <i>c</i> ][1,2,5]thiadiazol-4-yl)-1 <i>H</i> -indol-1-yl)(phenyl)methanone ( <b>6</b> ).....                         | 8  |
| 4-(1-tosyl-1 <i>H</i> -indol-2-yl)benzo[ <i>c</i> ][1,2,5]thiadiazole ( <b>7</b> ).....                                         | 9  |
| (9 <i>H</i> -fluoren-9-yl)methyl-2-(benzo[ <i>c</i> ][1,2,5]thiadiazol-4-yl)-1 <i>H</i> -indole-1-carboxylate ( <b>8</b> )..... | 9  |
| 4-(7-(1 <i>H</i> -indol-2-yl)benzo[ <i>c</i> ][1,2,5]thiadiazol-4-yl)- <i>N,N</i> -dimethylaniline ( <b>9</b> ).....            | 9  |
| <i>N,N</i> -dimethyl-4-(7-(1-methyl-1 <i>H</i> -indol-2-yl)benzo[ <i>c</i> ][1,2,5]thiadiazol-4-yl)aniline ( <b>10</b> ).....   | 10 |
| 1-(2-(7-(4-(dimethylamino)phenyl)benzo[ <i>c</i> ][1,2,5]thiadiazol-4-yl)-1 <i>H</i> -indol-1-yl)ethan-1-one ( <b>11</b> )..... | 10 |
| <i>N</i> -Boc-2-(7-(4-(dimethylamino)phenyl)benzo[ <i>c</i> ][1,2,5]thiadiazol-4-yl)-indole ( <b>12</b> ).....                  | 10 |
| 4-(7-bromobenzo[ <i>c</i> ][1,2,5]thiadiazol-4-yl)- <i>N,N</i> -dimethylaniline ( <b>13</b> ).....                              | 11 |
| II – Absorption and Emission spectra .....                                                                                      | 12 |
| III – Lippert-Mataga plots .....                                                                                                | 24 |

|                                                                                                                             |    |
|-----------------------------------------------------------------------------------------------------------------------------|----|
| IV – Additional cell staining images .....                                                                                  | 26 |
| V – Computational Studies Details .....                                                                                     | 28 |
| 1 - Method .....                                                                                                            | 28 |
| 2 - Method validation by reproducing reported work .....                                                                    | 29 |
| 3.1 – Calculations for <b>1</b> and <b>9</b> .....                                                                          | 30 |
| 3.2 - Effects of <i>N</i> -methylation - Calculations for <b>2</b> and <b>10</b> .....                                      | 31 |
| 3.3 - Effects of <i>N</i> -isopropyl substitution – Calculations for <b>3</b> .....                                         | 32 |
| 3.3 - Effect of <i>N</i> -acylation - Calculations for <b>4</b> and <b>11</b> .....                                         | 33 |
| 3.4 - Effect of <i>N</i> -benzoyl and <i>N</i> -Boc substitution – Calculations for <b>5</b> , <b>6</b> and <b>12</b> ..... | 34 |
| 3.6 - Effects of larger <i>N</i> -substitution – Calculations for <b>7</b> and <b>8</b> .....                               | 35 |
| VI – References .....                                                                                                       | 36 |
| VII – NMR spectra of new compounds .....                                                                                    | 37 |
| <sup>1</sup> H NMR (400 MHz, CDCl <sub>3</sub> ) of compound <b>2</b> .....                                                 | 37 |
| <sup>13</sup> C NMR (101 MHz, CDCl <sub>3</sub> ) of compound <b>2</b> .....                                                | 37 |
| <sup>1</sup> H NMR (400 MHz, CDCl <sub>3</sub> ) of compound <b>3</b> .....                                                 | 38 |
| <sup>13</sup> C NMR (101 MHz, CDCl <sub>3</sub> ) of compound <b>3</b> .....                                                | 38 |
| <sup>1</sup> H NMR (400 MHz, CDCl <sub>3</sub> ) of compound <b>4</b> .....                                                 | 39 |
| <sup>13</sup> C NMR (101 MHz, CDCl <sub>3</sub> ) of compound <b>4</b> .....                                                | 39 |
| <sup>1</sup> H NMR (400 MHz, CDCl <sub>3</sub> ) of compound <b>6</b> .....                                                 | 40 |
| <sup>13</sup> C NMR (101 MHz, CDCl <sub>3</sub> ) of compound <b>6</b> .....                                                | 40 |
| <sup>1</sup> H NMR (400 MHz, CDCl <sub>3</sub> ) of compound <b>7</b> .....                                                 | 41 |
| <sup>13</sup> C NMR (101 MHz, CDCl <sub>3</sub> ) of compound <b>7</b> .....                                                | 41 |
| <sup>1</sup> H NMR (400 MHz, CDCl <sub>3</sub> ) of compound <b>8</b> .....                                                 | 42 |
| <sup>13</sup> C NMR (101 MHz, CDCl <sub>3</sub> ) of compound <b>8</b> .....                                                | 42 |
| <sup>1</sup> H NMR (400 MHz, CDCl <sub>3</sub> ) of compound <b>9</b> .....                                                 | 43 |
| <sup>13</sup> C NMR (101 MHz, CDCl <sub>3</sub> ) of compound <b>9</b> .....                                                | 43 |
| <sup>1</sup> H NMR (400 MHz, CDCl <sub>3</sub> ) of compound <b>10</b> .....                                                | 44 |
| <sup>13</sup> C NMR (101 MHz, CDCl <sub>3</sub> ) of compound <b>10</b> .....                                               | 44 |
| <sup>1</sup> H NMR (400 MHz, CDCl <sub>3</sub> ) of compound <b>11</b> .....                                                | 45 |
| <sup>13</sup> C NMR (101 MHz, CDCl <sub>3</sub> ) of compound <b>11</b> .....                                               | 45 |
| <sup>1</sup> H NMR (400 MHz, CDCl <sub>3</sub> ) of compound <b>12</b> .....                                                | 46 |
| <sup>13</sup> C NMR (101 MHz, CDCl <sub>3</sub> ) of compound <b>12</b> .....                                               | 46 |

## General Information

**Materials.** All reagents and solvents were purchased from Sigma-Aldrich or Fluorochem and used without further purification. All solvents used for synthesis were obtained from VWR Chemicals and used without further purification. For photophysical characterization, DMSO and chloroform of spectroscopic grade were purchased from VWR Chemicals; THF and toluene from VWR Chemicals were distilled before use. For reactions performed at room temperature:  $18\text{ }^{\circ}\text{C} \leq \text{r.t.} \leq 23\text{ }^{\circ}\text{C}$ .

**Chromatography.** Thin-layer chromatography (TLC) was carried out using aluminum plates coated with silica gel (60F<sub>254</sub>, Merck) and visualized through exposure to UV light ( $\lambda = 254\text{ nm}$  and  $365\text{ nm}$ ). Flash silica gel column chromatography was performed using silica gel (particle size  $40\text{--}63\text{ }\mu\text{m}$ , VWR Chemicals).

**Characterization.** NMR spectra for the characterization of compounds were recorded at 298 K on a Varian Unity instrument 400 MHz ( $^1\text{H}$ ) and at 101 MHz ( $^{13}\text{C}$ ) and 377 MHz ( $^{19}\text{F}$ ). Chemical shifts ( $\delta$ ) are reported in ppm using the residual solvent peak in  $\text{CDCl}_3$  ( $\delta_{\text{H}} = 7.26$  and  $\delta_{\text{C}} = 77.2$  ppm) or DMSO ( $\delta_{\text{H}} = 2.50$  and  $\delta_{\text{C}} = 39.5$  ppm) as internal reference;<sup>1</sup> in the case of  $^{19}\text{F}$  spectra chemical shifts were calibrated to an external standard at 0.00 ppm ( $\text{CFCl}_3$ ). Coupling constants ( $J$ ) are given in Hz and the apparent resonance multiplicity is reported as s (singlet), d (doublet), t (triplet), q (quartet), p (pentet), h (hexet), hept (heptet), or m (multiplet). High-resolution mass spectrometry (HRMS) data was determined at Imperial College London, Molecular Characterization Facility, Department of Chemistry, London, UK. UV/Vis absorption spectra were acquired on a UV-1650PC Shimadzu instrument at room temperature using quartz cuvettes (10 mm). Absorption maxima ( $\lambda_{\text{max}}$ ) are reported in nm with the molar extinction coefficient ( $\epsilon$ ) in  $\text{M}^{-1}\text{ cm}^{-1}$  with a margin of error of 0 to 6 %. For each compound three data points with known different concentrations were acquired and the measured absorbances ( $\leq 1$ ) were plotted against the concentrations. The molar extinction coefficient was then determined according to the Beer-Lambert law as the slope of the linear fit. Fluorescence measurements were carried out using a Spex Fluorolog 1680 0.22m Double Spectrometer instrument. Fluorescence quantum yields ( $\Phi_{\text{F}}$ ) were determined relative to fluorescein in 20 mM aq. NaOH ( $\Phi_{\text{F}} = 0.93$ )<sup>2</sup> or quinine sulfate in 0.1 M aq.  $\text{H}_2\text{SO}_4$  ( $\Phi_{\text{F}} = 0.55$ ).<sup>3</sup> Three fluorescence spectra were recorded per compound per solvent, and the area under the curves were plotted against the absorbances at the excitation wavelength. The quantum yields were then calculated from the slope of the linear fit *via* the comparative method, with a margin of error of 0 to 10%. Refractive indices of solvents were adjusted for quantum yield calculations based on the excitation wavelength used.<sup>4-6</sup> The excitation wavelength (360 or 430 nm) and concentrations for the quantum yield measurements were selected so that the absorbance was below 0.1 to prevent self-absorption effects. Obtained raw data was processed using OriginPro 8 software. Emission spectra illustrated herein were normalized to the peak maximum of interest and smoothed using an FFT filter function with 5 point window.

### Cell Cultures

SK-MEL-28 (ATCC® HTB-27™), U1242MG (kind gift from Professor Bengt Westermark) and Normal Human Astrocytes (NHA) (3H Biomedical, Cat#SC1800) were grown in DMEM, high glucose, GlutaMAX™ (Thermo Fisher Scientific, Cat#61965026) supplemented with 10% heat inactivated Fetal Bovine Serum (Thermo Fisher Scientific, Cat#10270106) and Penicillin-Streptomycin (Sigma-Aldrich, Cat#P0781) using 100 mm TC treated dishes (VWR, Cat#734-0006) and a humidified incubator at 37°C with 5% CO<sub>2</sub>. Cells were passaged using Trypsin – EDTA Solution (Sigma-Aldrich, Cat#T3924) after washing with Dulbecco's Phosphate-Buffered Saline (DPBS) (Thermo Fisher Scientific, Cat#14190094).

### Cell Viability Assay

Cells were counted using a Countess II Automated Cell Counter (ThermoFisher Scientific, Cat#AMQAX1000) and seeded in 96 well plates, 10 000 live cells/well, the day before treatment. Compounds were diluted in Dimethyl Sulfoxide (DMSO) (Sigma-Aldrich, Cat#317275) as 2 mM stock solutions. Cells were incubated with compounds for 24 hours at a final concentration of 10µM (for a final DMSO concentration of ca. 0.15%) with DMSO treated cells as control. Cell viability was analyzed after 2.5 hours incubation with Resazurin Reagent (1:10) (Sigma-Aldrich, Cat#R7017) using a Synergy™ HTX Multi-Mode Reader (BioTek), fluorescence was detected by excitation at 530 nm and emission at 590 nm. Experiments were run in triplicates and repeated twice.

### Cell Staining (Fluorescent staining)

Cells were counted (as mentioned above) and seeded in chamber slides (Sarstedt, Cat#94.6140.802) the day before treatment at following densities; SK-MEL-28 and U1242MG; 80 000 live cells/well, NHA; 65 000 live cells/well. Cells were incubated with compounds at a final concentration of 10µM for 24 hours with DMSO treated cells as control, fixated using a 4% Buffered Formaldehyde Solution (Histolab Cat#02176) for 15 minutes at room temperature, followed by incubation with DAPI (1:1000) (Sigma-Aldrich, Cat#D9564) diluted in Tris-Buffered Saline (VWR, Cat# 97062-370) with 1% TWEEN® 20 (Sigma-Aldrich, Cat#P1379) (TBST) for 15 minutes at room temperature. Cells not stained with DAPI were incubated with TBST alone. Slides were then washed in TBST and mounted using Fluoromount (Sigma-Aldrich, Cat#F4680). Stainings were performed twice for each compound to ensure reproducibility, photos were taken using a Leica DMI8 microscope. Different filters (channels) were used for visualizing the fluorescence; Blue channel (ex 325-375nm, em 435-485 nm), green channel (ex 460-500 nm, em 512-542 nm), yellow channel (ex 532-558 nm, em 570-640 nm) and red channel (ex 590-650nm, em 662-738nm).

Colocalization experiments with compound **11** in melanoma cells were performed using Anti-ADFP antibody [EPR3713] from Abcam (ab108323). Anti-rabbit IgG Fab2 Alexa FluorR 647 from Cell Signaling (Cat#4414S) was used as secondary antibody. A stock solution of the compound in DMSO was prepared at 2.5 mM concentration. Live cells were incubated with compounds at a final concentration of 10 µM for 24 hours (*i.e.*, 0.4 vol% DMSO). The cells were washed using PBS, followed by fixation using a 4% Buffered Formaldehyde Solution (Histolab Cat#02176) for 15 minutes at room temperature. Subsequently, cells were permeabilized with 0.2% Triton X/ PBS for 5 min at 4 °C, washed with PBS (×2), and blocked with 0.5% BSA/ PBS for 30 min at room temperature. The cells were then incubated with the primary antibody diluted in 0.5% BSA/ PBS (200 µL; 1:1000) for 2 h at room temperature, washed with PBS (3 × 5 min), followed by incubation with secondary antibody (1:1000) together with DAPI (1:1000) diluted in 0.5% BSA/ PBS (200 µL) for 1 h at room temperature, washing

with PBS (3 × 5 min) and mounting using Fluoromount (Sigma-Aldrich, Cat#F4680). Images were taken on a Zeiss LSM700 confocal microscope and processed using ImageJ.

#### **BBB scores calculation**

The BBB scores were calculated by uploading the chemical structures of the compounds into the online platform CBLigand developed by Xie *et. al.* (<https://www.cbligand.org/BBB/>) as part of the AlzPlatform system.<sup>7</sup> The presented scores were obtained using the default parameters: support vector machine (SVM) algorithm and Molecular ACCess System (MACCS) fingerprints. The results were cross-checked with all other available combinations of parameters, confirming the BBB+ character of all compounds in this study.

## I – Synthetic procedures

### General procedure A for the Suzuki coupling reactions

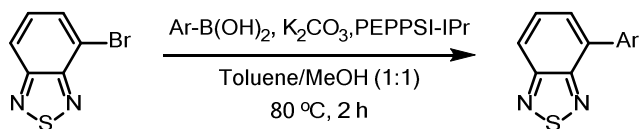

The procedure was adapted from reported literature as follows:<sup>8</sup> to a solution of 4-Bromo-2,1,3-benzothiadiazole (100 mg, 0.47 mmol, 1.0 equiv.) and K<sub>2</sub>CO<sub>3</sub> (190 mg, 1.38 mmol, 3.2 equiv.) in toluene/methanol (1:1, 14 mL), the relevant arylboronic acid or boronate ester (0.94 mmol, 2.0 equiv.) and PEPPSI-IPr (6.3 mg, 2 mol%) were added. The reaction mixture was stirred at 80 °C for 2 h, then allowed to cool down to r.t.. The reaction mixture was diluted with water (50 mL) and extracted with EtOAc (3 × 30 mL). The combined organic layers were washed with brine (2 × 30 mL), dried over Na<sub>2</sub>SO<sub>4</sub> and concentrated *in vacuo*. The crude product was purified by column chromatography.

### General procedure B for the Boc-deprotection of *N*-Boc-indole-BTD derivatives

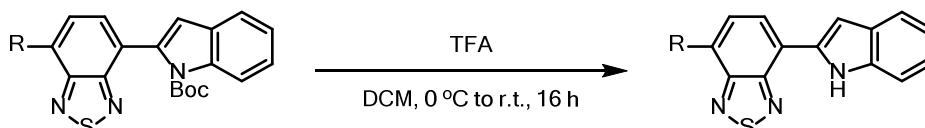

To a solution of the relevant BTD-indole derivative (1.38 mmol) in CH<sub>2</sub>Cl<sub>2</sub> (20 mL) stirred at 0 °C, trifluoroacetic acid (TFA) (4 mL, 50 mmol) was added. The resulting solution was allowed to reach r.t. and was stirred overnight (*ca.* 16 h). The reaction was quenched with sat. aq. NaHCO<sub>3</sub> (100 mL) and extracted with CH<sub>2</sub>Cl<sub>2</sub> (2 × 30 mL). The combined organic layers were washed with brine (2 × 50 mL), dried over Na<sub>2</sub>SO<sub>4</sub> and concentrated *in vacuo*. The resulting crude products dried under high vacuum for 16 h and were deemed of sufficient purity (as judged by NMR) to be used without further purification.

### General procedure C for the *N*-functionalization of *N*-H-indole-BTD derivatives

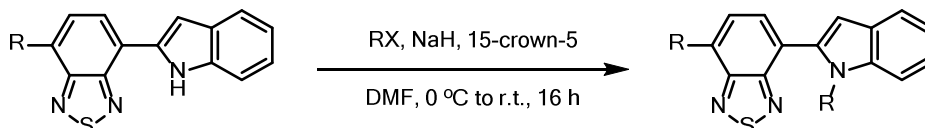

To a solution of the relevant BTD-indole derivative (0.1 mmol) in DMF (2 mL) stirred at 0 °C, NaH (5 mg, 0.12 mmol, 1.2 equiv.) was added. The resulting deep, bright purple solution was allowed to reach r.t. and stirred for 30 min, then 15-crown-5 (22 mg, 0.1 mmol, 1.0 equiv) and the relevant electrophile (1.5 mmol, 1.5 equiv.) were added. The resulting solution was stirred overnight at r.t. – 65 °C, as indicated. The reaction was quenched with water (10 mL) and extracted with EtOAc (3 × 10 mL). The combined organic layers were washed with brine (3 × 50 mL), dried over Na<sub>2</sub>SO<sub>4</sub> and concentrated *in vacuo*. The crude product was purified by column chromatography.

#### 4-(1*H*-indol-2-yl)benzo[*c*][1,2,5]thiadiazole (**1**).

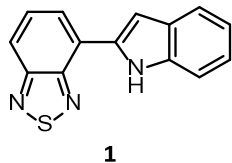

The compound was synthesized from **5** (481 mg, 1.38 mmol), following the general procedure B (described above), yielding **1** as a brown solid (345 mg, 99%) whose characterization data was in accordance with reported literature.<sup>9</sup> The purity (as judged by NMR) was deemed sufficient and the compound was used without further purification. <sup>1</sup>H NMR (400 MHz, CDCl<sub>3</sub>)  $\delta$  = 10.83 (br s, 1H), 8.10 – 8.03 (m, 1H), 7.92 – 7.88 (m, 1H), 7.72 – 7.61 (m, 2H), 7.55 – 7.50 (m, 1H), 7.29 – 7.23 (m, 1H), 7.22 – 7.13 (m, 2H); <sup>13</sup>C NMR (101 MHz, CDCl<sub>3</sub>)  $\delta$  = 155.6, 151.9, 137.1, 134.6, 129.9, 128.2, 124.6, 124.5, 123.0, 120.9, 120.3, 119.7, 111.5, 100.9.

#### 4-(1-methyl-1*H*-indol-2-yl)benzo[*c*][1,2,5]thiadiazole (**2**).

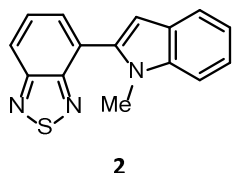

The compound was synthesized according to the general procedure A (described above) using *N*-methyl-indole-2-boronic acid pinacol ester (237 mg, 0.92 mmol, 2.0 equiv.). The crude mixture was recrystallized from hexane to provide **2** as a fluorescent orange solid (103 mg, 84%). <sup>1</sup>H NMR (400 MHz, CDCl<sub>3</sub>)  $\delta$  = 8.12 – 8.06 (m, 1H), 7.77 – 7.73 (m, 1H), 7.72 – 7.68 (m, 2H), 7.48 – 7.45 (m, 1H), 7.38 – 7.33 (m, 1H), 7.25 – 7.20 (m, 1H), 6.90 (s, 1H), 3.74 (s, 3H); <sup>13</sup>C NMR (101 MHz, CDCl<sub>3</sub>)  $\delta$  = 155.2, 153.9, 138.8, 136.9, 130.1, 129.4, 128.0, 126.4, 122.4, 121.4, 121.0, 120.0, 109.8, 104.6, 31.9; HR-MS: (ESI-TOF) calcd for [C<sub>15</sub>H<sub>11</sub>N<sub>3</sub>S + H]<sup>+</sup> 266.0752; found 266.0749.

#### 4-(1-isopropyl-1*H*-indol-2-yl)benzo[*c*][1,2,5]thiadiazole (**3**).

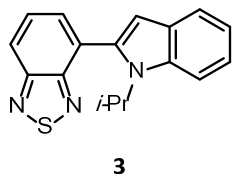

The compound was synthesized from **1** (25 mg, 0.1 mmol), according to the general procedure C (described above), using isopropyl bromide (31 mg, 0.12 mmol, 1.2 equiv.) at 65 °C. The crude mixture was recrystallized from hexane to provide **3** as a dark orange solid (5 mg, 18%). <sup>1</sup>H NMR (400 MHz, CDCl<sub>3</sub>)  $\delta$  = 8.08 (dd, *J* = 8.6, 1.3 Hz, 1H), 7.71 – 7.63 (m, 4H), 7.26 – 7.21 (m, 1H), 7.16 – 7.11 (m, 1H), 6.66 (s, 1H), 4.39 (hept, *J* = 7.0 Hz, 1H), 1.62 (d, *J* = 7.0 Hz, 6H); <sup>13</sup>C NMR (101 MHz, CDCl<sub>3</sub>)  $\delta$  = 155.0, 154.4, 136.4, 135.8, 130.5, 129.3, 129.1, 127.3, 121.6, 121.5, 121.3, 119.5, 112.5, 104.2, 49.1, 21.4; HR-MS: (ESI-TOF) calcd for [C<sub>17</sub>H<sub>15</sub>N<sub>3</sub>S + H]<sup>+</sup> 294.1059; found 294.1063.

#### 1-(2-(benzo[c][1,2,5]thiadiazol-4-yl)-1H-indol-1-yl)ethan-1-one (4).

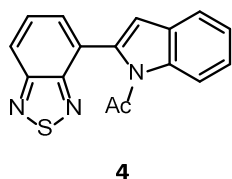

The compound was synthesized from **1** (25 mg, 0.1 mmol), following the general procedure C (described above), using acetyl chloride (12 mg, 0.15 mmol, 1.5 equiv.) at r.t.. The crude mixture was purified by column chromatography (pentane/ CH<sub>2</sub>Cl<sub>2</sub> 1:4, *R<sub>f</sub>* = 0.17) to provide **4** as a yellow solid (21 mg, 72 %). <sup>1</sup>H NMR (400 MHz, CDCl<sub>3</sub>) δ = 8.27 (d, *J* = 8.5 Hz, 1H), 8.07 (dd, *J* = 8.5, 1.4 Hz, 1H), 7.76 – 7.67 (m, 2H), 7.63 (d, *J* = 7.8 Hz, 1H), 7.45 – 7.38 (m, 1H), 7.35 – 7.29 (m, 1H), 6.88 (d, *J* = 0.8 Hz, 1H), 2.17 (s, 3H); <sup>13</sup>C NMR (101 MHz, CDCl<sub>3</sub>) δ = 170.6, 154.9, 153.6, 137.5, 135.4, 129.5, 129.0, 128.3, 127.9, 125.5, 123.5, 121.8, 121.0, 115.5, 113.4, 26.6; HR-MS: (ESI-TOF) calcd for [C<sub>16</sub>H<sub>11</sub>N<sub>3</sub>OS + H]<sup>+</sup> 294.0696; found 294.0694.

#### *N*-Boc-2-(benzo[c][1,2,5]thiadiazol-4-yl)-indole (5).

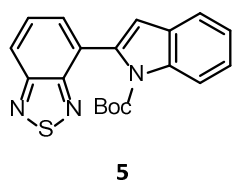

The compound was synthesized according to the general procedure B (described above) using *N*-Boc-indole-2-boronic acid (240 mg, 0.92 mmol, 2.0 equiv.). Purification by column chromatography (hexane/CH<sub>2</sub>Cl<sub>2</sub> 1:1, *R<sub>f</sub>* = 0.23) gave **5** as a fluorescent yellow solid (147 mg, 91 %) whose characterization data was in accordance with reported literature.<sup>9</sup> <sup>1</sup>H NMR (400 MHz, CDCl<sub>3</sub>) δ = 8.31 (d, *J* = 8.4 Hz, 1H), 8.06 – 7.99 (m, 1H), 7.69 – 7.65 (m, 2H), 7.64 – 7.60 (m, 1H), 7.43 – 7.36 (m, 1H), 7.32 – 7.26 (m, 1H), 6.78 (s, 1H), 1.08 (s, 9H); <sup>13</sup>C NMR (101 MHz, CDCl<sub>3</sub>) δ = 154.8, 154.2, 149.9, 137.6, 135.8, 129.5, 129.0, 128.9, 127.5, 124.9, 123.0, 121.1, 120.8, 115.5, 111.3, 83.0, 27.4.

#### 2-(benzo[c][1,2,5]thiadiazol-4-yl)-1H-indol-1-yl(phenyl)methanone (6).

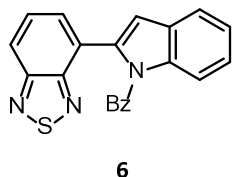

The compound was synthesized from **1** (25 mg, 0.1 mmol), following the general procedure C (described above), using benzoyl chloride (21 mg, 0.15 mmol, 1.5 equiv.) at r.t.. The crude mixture was purified by column chromatography (Toluene/EtOAc/CH<sub>2</sub>Cl<sub>2</sub> 15:1:1, *R<sub>f</sub>* = 0.53) to provide **6** as a sticky yellow solid (29 mg, 83 %). <sup>1</sup>H NMR (400 MHz, CDCl<sub>3</sub>) δ = 7.79 (d, *J* = 8.8 Hz, 1H), 7.71 – 7.64 (m, 3H), 7.55 – 7.48 (m, 3H), 7.32 – 7.26 (m, 3H), 7.14 – 7.08 (m, 2H), 7.01 (s, 1H); <sup>13</sup>C NMR (101 MHz, CDCl<sub>3</sub>) δ = 169.9, 154.6, 152.8, 138.3, 136.7, 134.8, 132.4, 129.5, 129.2, 129.0, 128.2, 127.7, 127.2, 124.9, 123.2, 121.0, 121.0, 114.5, 111.7. HR-MS: (ESI-TOF) calcd for [C<sub>21</sub>H<sub>13</sub>N<sub>3</sub>OS + H]<sup>+</sup> 356.0858; found 356.0860.



#### 4-(1-tosyl-1H-indol-2-yl)benzo[c][1,2,5]thiadiazole (7).

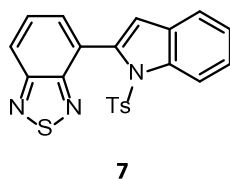

The compound was synthesized from **1** (25 mg, 0.1 mmol), following the general procedure C (described above), using tosyl chloride (29 mg, 0.15 mmol, 1.5 equiv.) at 120 °C. The crude mixture was purified by column chromatography (pentane/CH<sub>2</sub>Cl<sub>2</sub> 1:4, *R<sub>f</sub>*=0.27) to provide **7** as an orange solid (21 mg, 52 %). Note: the product was observed as a mixture of rotamers (major:minor = *ca.* 10:1) in the NMR spectra. <sup>1</sup>H NMR (400 MHz, CDCl<sub>3</sub>)  $\delta_{major}$  = 8.29 (d, *J* = 8.4 Hz, 1H), 8.09 (d, *J* = 8.4 Hz, 1H), 7.78–7.69 (m, 2H), 7.52 (d, *J* = 8.0 Hz, 1H), 7.42–7.36 (m, 1H), 7.32–7.26 (m, 1H), 7.26–7.23 (m, 2H), 6.99–6.95 (m, 2H), 6.92 (s, 1H), 2.26 (s, 3H); <sup>13</sup>C NMR (101 MHz, CDCl<sub>3</sub>)  $\delta_{major}$  = 154.7, 154.2, 144.7, 138.2, 136.5, 134.5, 131.1, 130.3, 129.2, 128.8, 126.7, 125.8, 125.3, 124.3, 122.0, 121.2, 116.4, 115.4, 21.5; HR-MS: (ESI-TOF) calcd for [C<sub>21</sub>H<sub>15</sub>N<sub>3</sub>O<sub>2</sub>S<sub>2</sub> + H]<sup>+</sup> 406.0678; found 406.0677.

#### (9H-fluoren-9-yl)methyl-2-(benzo[c][1,2,5]thiadiazol-4-yl)-1H-indole-1-carboxylate (8).

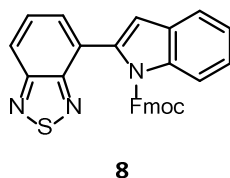

The compound was synthesized from **1** (25 mg, 0.1 mmol), following the general procedure C (described above), using Fmoc chloride (31 mg, 0.12 mmol, 1.2 equiv.) at r.t.. Purification by column chromatography (CH<sub>2</sub>Cl<sub>2</sub>, *R<sub>f</sub>* = 0.55) gave **8** as a fluorescent yellow solid (12 mg, 26 %). <sup>1</sup>H NMR (400 MHz, CDCl<sub>3</sub>)  $\delta$  = 7.98–7.94 (m, 1H), 7.91–7.86 (m, 1H), 7.74–7.70 (m, 3H), 7.65–7.59 (m, 2H), 7.41–7.32 (m, 5H), 7.30–7.26 (m, 2H), 7.25–7.22 (m, 1H), 6.85 (s, 1H), 4.43 (d, *J* = 6.3 Hz, 2H), 3.64 (t, *J* = 6.3 Hz, 1H); <sup>13</sup>C NMR (101 MHz, CDCl<sub>3</sub>)  $\delta$  = 154.7, 153.9, 151.5, 143.0, 141.2, 137.2, 135.9, 129.3, 129.1, 128.0, 127.9, 127.6, 127.2, 125.2, 124.7, 123.3, 121.5, 120.9, 120.0, 115.5, 112.3, 68.7, 46.4; HR-MS: (ESI-TOF) calcd for [C<sub>29</sub>H<sub>19</sub>N<sub>3</sub>O<sub>2</sub>S + H]<sup>+</sup> 474.1276; found 474.1281.

#### 4-(7-(1H-indol-2-yl)benzo[c][1,2,5]thiadiazol-4-yl)-N,N-dimethylaniline (9).

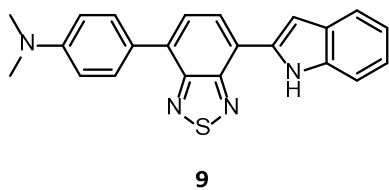

The compound was synthesized from **12** (135 mg, 0.29 mmol), following the general procedure B (described above), yielding **9** as a dark red solid (103 mg, 96 %). The purity (as judged by NMR) was deemed sufficient, and the compound was used without further purification. <sup>1</sup>H NMR (400 MHz, CDCl<sub>3</sub>)  $\delta$  = 10.92 (br s, 1H), 8.14 (d, *J* = 7.6 Hz, 1H), 7.94 (d, *J* = 8.5 Hz, 2H), 7.72 (d, *J* = 7.6 Hz, 1H), 7.69 (d, *J* = 8.1 Hz, 1H), 7.53 (d, *J* = 8.1 Hz, 1H), 7.26–7.21 (m, 1H), 7.19 (s, 1H), 7.17–7.12 (m, 1H), 6.89 (d, *J* = 8.5 Hz, 2H), 3.06 (s, 6H); <sup>13</sup>C NMR (101 MHz, CDCl<sub>3</sub>)  $\delta$  = 154.2, 152.9, 150.6, 137.0, 135.2, 132.9, 130.0, 128.4, 126.4, 125.6, 124.9, 122.6, 121.7, 120.6, 120.2, 112.3, 111.4, 100.1, 40.4; HR-MS: (ESI-TOF) calcd for [C<sub>22</sub>H<sub>18</sub>N<sub>4</sub>S + H]<sup>+</sup> 371.1325; found 371.1322.

***N,N*-dimethyl-4-(7-(1-methyl-1*H*-indol-2-yl)benzo[*c*][1,2,5]thiadiazol-4-yl)aniline (**10**).**

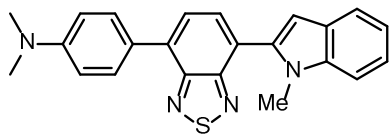

**10**

The compound was synthesized from **9** (37 mg, 0.1 mmol), following the general procedure C (described above), using methyl iodide (10  $\mu$ L, 0.15 mmol, 1.5 equiv.) at r.t. for 1 h. The crude mixture was purified by column chromatography ( $\text{CH}_2\text{Cl}_2$ ,  $R_f = 0.56$ ) to provide **10** as an orange solid (14 mg, 36 %).  $^1\text{H}$  NMR (400 MHz,  $\text{CDCl}_3$ )  $\delta = 7.99 - 7.94$  (m, 2H), 7.76 - 7.71 (m, 2H), 7.70 (dd,  $J = 7.9, 1.0$  Hz, 1H), 7.43 (dd,  $J = 8.3, 1.0$  Hz, 1H), 7.33 - 7.26 (m, 1H), 7.20 - 7.14 (m, 1H), 6.93 - 6.88 (m, 2H), 6.85 (s, 1H), 3.75 (s, 3H), 3.07 (s, 6H);  $^{13}\text{C}$  NMR (101 MHz,  $\text{CDCl}_3$ )  $\delta = 155.7, 153.9, 150.7, 138.7, 137.5, 134.5, 130.8, 130.1, 128.0, 125.7, 124.9, 123.4, 122.1, 120.8, 119.9, 112.3, 109.7, 104.0, 40.4, 31.9$ ; HR-MS: (ESI-TOF) calcd for  $[\text{C}_{23}\text{H}_{20}\text{N}_4\text{S} + \text{H}]^+$  385.1481; found 385.1469.

**1-(2-(7-(4-(dimethylamino)phenyl)benzo[*c*][1,2,5]thiadiazol-4-yl)-1*H*-indol-1-yl)ethan-1-one (**11**).**

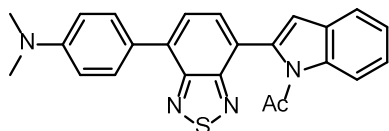

**11**

The compound was synthesized from **9** (37 mg, 0.1 mmol), following the general procedure C described above, using acetyl chloride (12 mg, 0.15 mmol, 1.5 equiv.) at r.t. for 2 h. The crude mixture was purified by column chromatography (Toluene/EtOAc/ $\text{CH}_2\text{Cl}_2$  15:1:1,  $R_f = 0.38$ ) to provide **11** as a yellow solid (37 mg, 90 %).  $^1\text{H}$  NMR (400 MHz,  $\text{CDCl}_3$ )  $\delta = 8.33 - 8.30$  (m, 1H), 7.98 - 7.94 (m, 2H), 7.76 (dd,  $J = 12.2, 7.3$  Hz, 2H), 7.64 - 7.61 (m, 1H), 7.43 - 7.38 (m, 1H), 7.33 - 7.28 (m, 1H), 6.92 - 9.86 (m, 3H), 3.07 (s, 6H), 2.17 (s, 3H);  $^{13}\text{C}$  NMR (101 MHz,  $\text{CDCl}_3$ )  $\delta = 171.0, 154.4, 153.6, 150.8, 137.6, 135.9, 134.9, 130.1, 129.2, 129.1, 125.7, 125.3, 124.7, 124.6, 123.5, 120.8, 115.7, 113.0, 112.3, 40.4, 26.7$ ; HR-MS: (ESI-TOF) calcd for  $[\text{C}_{24}\text{H}_{20}\text{N}_4\text{OS} + \text{H}]^+$  413.1431; found 413.1422.

***N*-Boc-2-(7-(4-(dimethylamino)phenyl)benzo[*c*][1,2,5]thiadiazol-4-yl)-indole (**12**).**

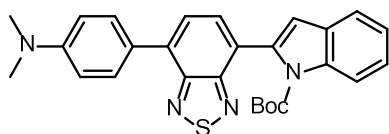

**12**

The compound was synthesized from **13** (100 mg, 0.30 mmol) following the general procedure A (described above) using *N*-Boc-indole-2-boronic acid (86 mg, 0.33 mmol, 1.1 equiv.). Purification by column chromatography (hexane/ $\text{CH}_2\text{Cl}_2$  1:2,  $R_f = 0.60$ ) gave **12** as a fluorescent yellow solid (140 mg, 99 %).  $^1\text{H}$  NMR (400 MHz,  $\text{CDCl}_3$ )  $\delta = 8.29$  (d,  $J = 8.4$  Hz, 1H), 7.95 (d,  $J = 8.8$  Hz, 2H), 7.73 - 7.69 (m, 2H), 7.62 (d,  $J = 7.7$  Hz, 1H), 7.40 - 7.36 (m, 1H), 7.31 - 7.26 (m, 1H), 6.91 (d,  $J = 8.8$  Hz, 2H), 6.79 (s, 1H), 3.06 (s, 6H), 1.10 (s, 9H);  $^{13}\text{C}$  NMR (101 MHz,  $\text{CDCl}_3$ )  $\delta = 155.0, 153.6, 150.6, 150.0, 137.5, 136.3, 134.2, 130.1, 129.1, 128.2, 126.1, 125.8, 125.1, 124.7, 122.9, 120.7, 115.4, 112.3, 110.9, 83.0, 40.4, 27.5$ ; HR-MS: (ESI-TOF) calcd for  $[\text{C}_{27}\text{H}_{26}\text{N}_4\text{O}_2\text{S} + \text{H}]^+$  471.1855; found 471.1845.

**4-(7-bromobenzo[c][1,2,5]thiadiazol-4-yl)-*N,N*-dimethylaniline (13).**

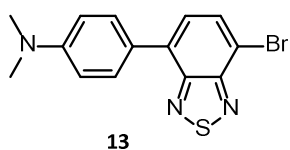

The compound was prepared as described in the literature using 4,7-dibromo-2,1,3-benzothiadiazole (201 mg, 0.68 mmol).<sup>10</sup> The crude mixture was purified by column chromatography (CH<sub>2</sub>Cl<sub>2</sub>, *R<sub>f</sub>*=0.47) to provide **13** as an orange solid (147 mg, 65%) whose characterization data was in accordance with the reported literature.<sup>10</sup> <sup>1</sup>H NMR (400 MHz, CDCl<sub>3</sub>)  $\delta$  = 7.87 – 7.81 (m, 3H), 7.48 (d, *J* = 7.7 Hz, 1H), 6.85 (d, *J* = 8.9 Hz, 2H), 3.04 (s, 6H).

## II – Absorption and Emission spectra

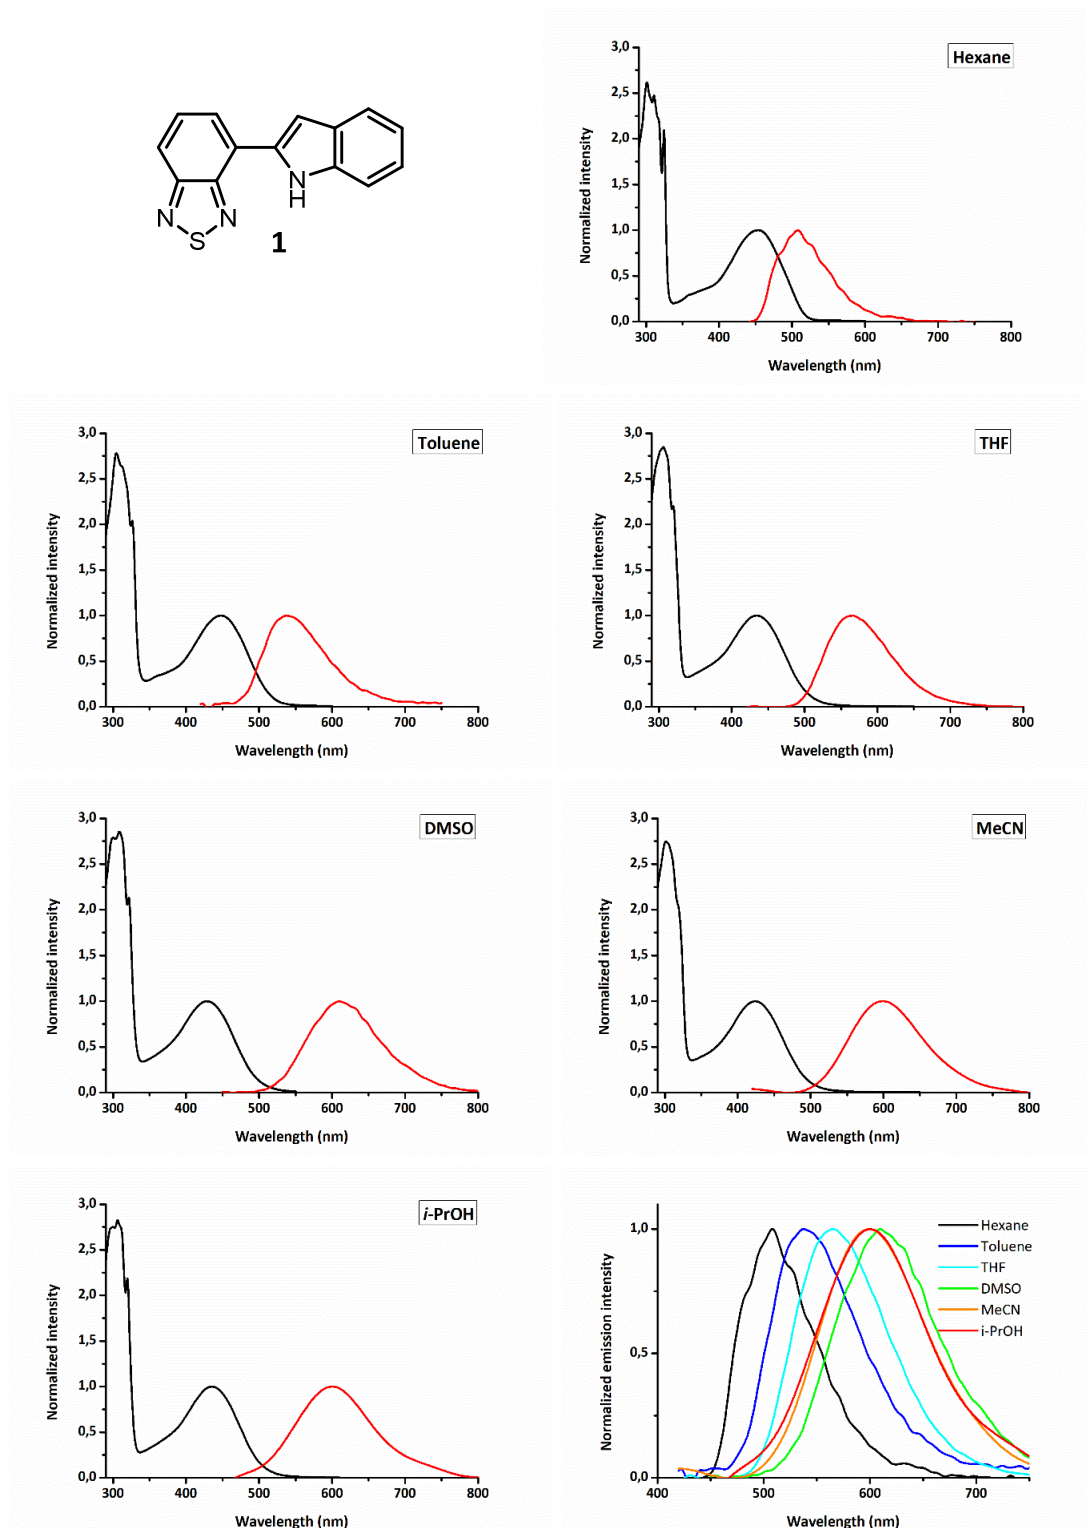

**Figure S1:** Normalized UV absorption (black) and emission (red) spectra of **1** in various solvents. The bottom right spectrum shows the combined emission spectra to visualize solvatochromism.

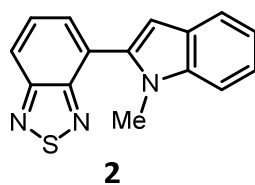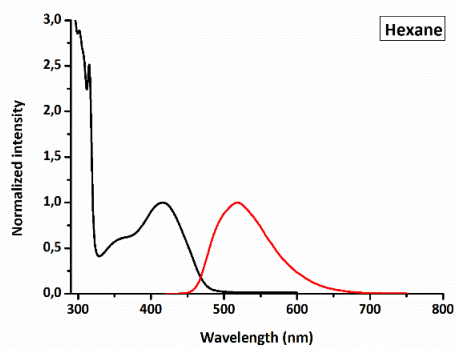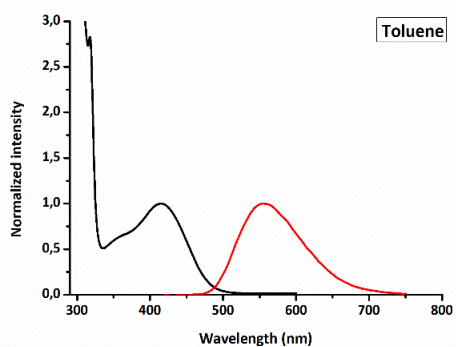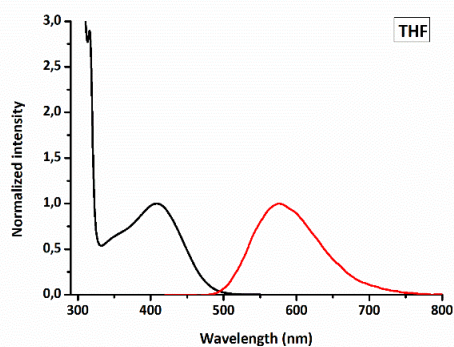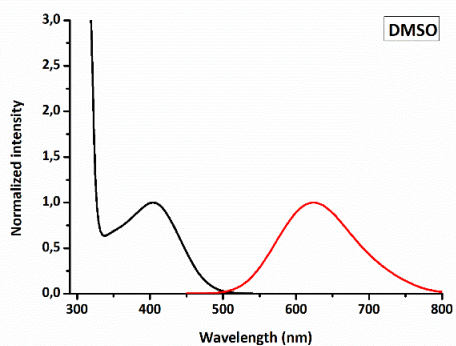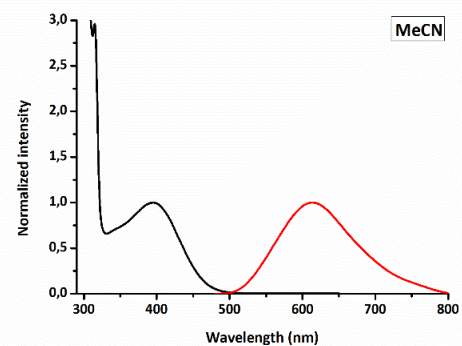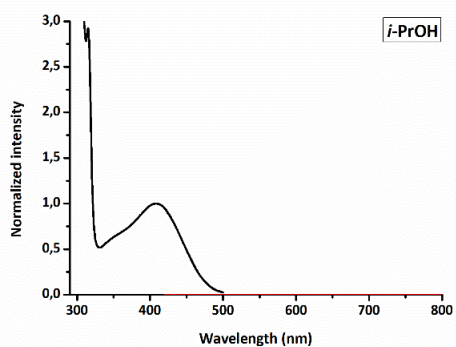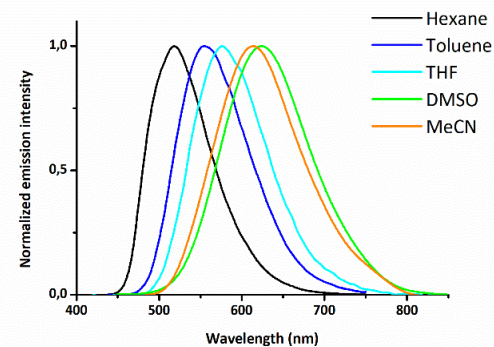

**Figure S2:** Normalized UV absorption (black) and emission (red) spectra of **2** in various solvents. No emission was observed in *i*-PrOH. The bottom right spectrum shows the combined emission spectra to visualize solvatochromism.

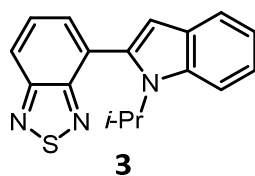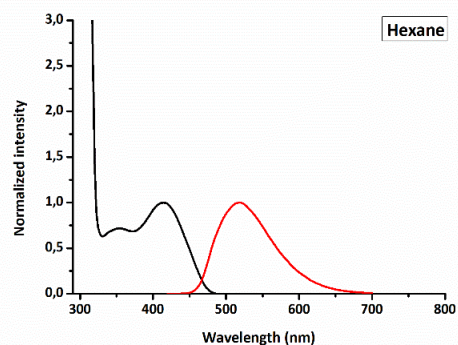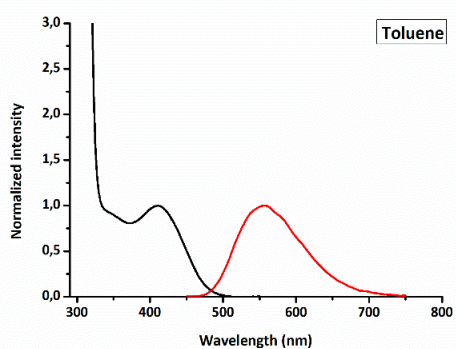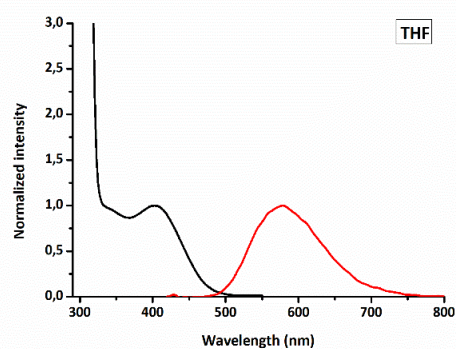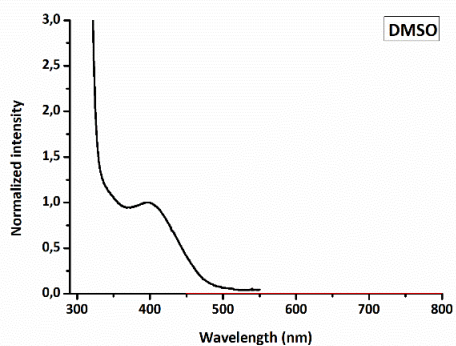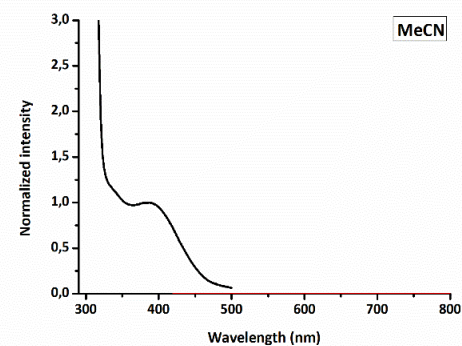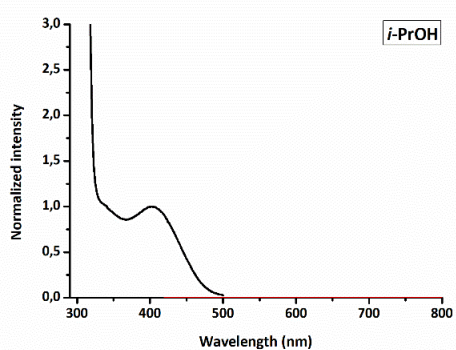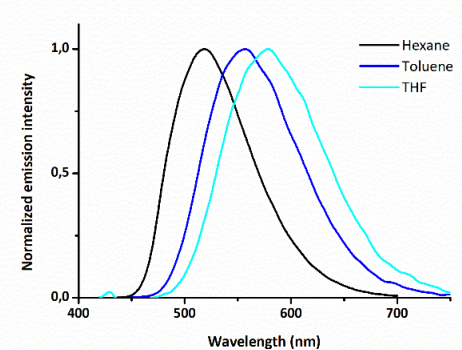

**Figure S3:** Normalized UV absorption (black) and emission (red) spectra of **3** in various solvents. No emission was observed in DMSO, MeCN or *i*-PrOH. The bottom right spectrum shows the combined emission spectra to visualize solvatochromism.

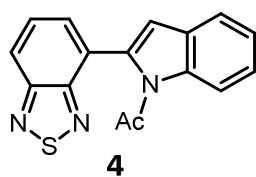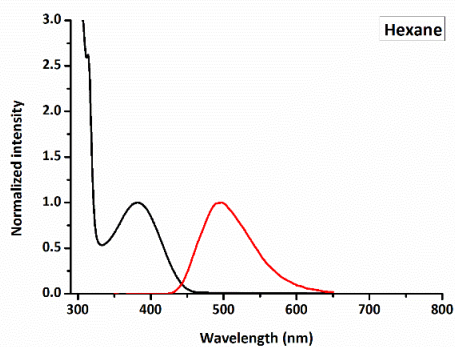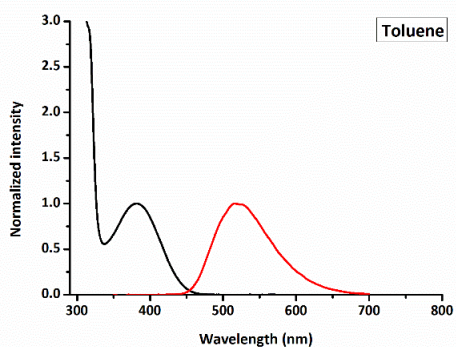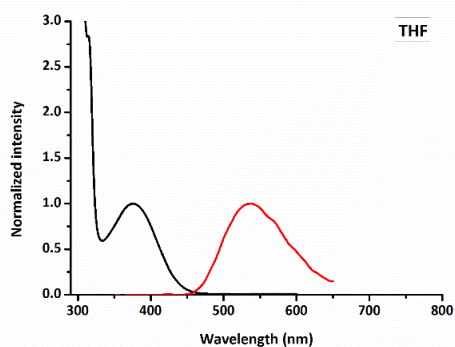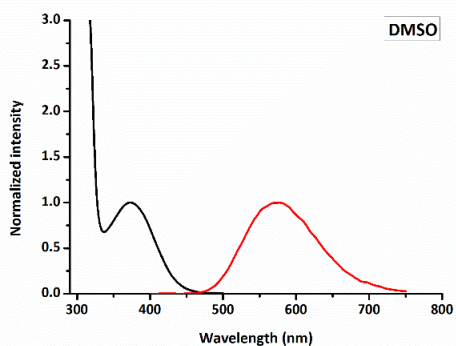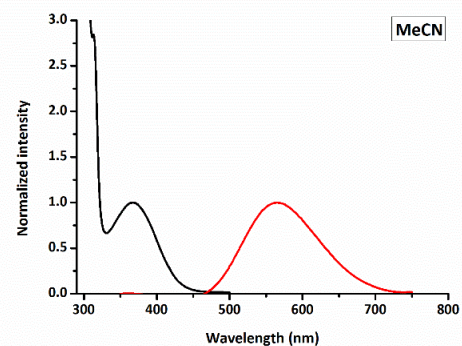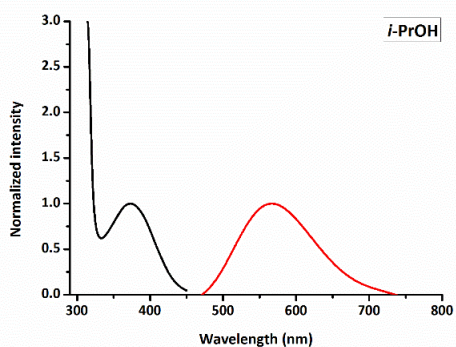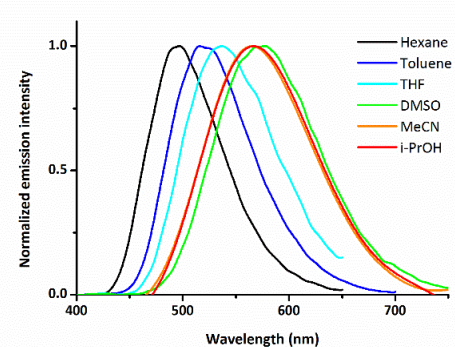

**Figure S4:** Normalized UV absorption (black) and emission (red) spectra of **4** in various solvents. The bottom right spectrum shows the combined emission spectra to visualize solvatochromism.

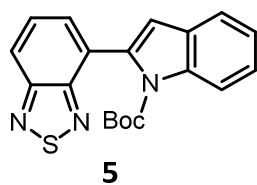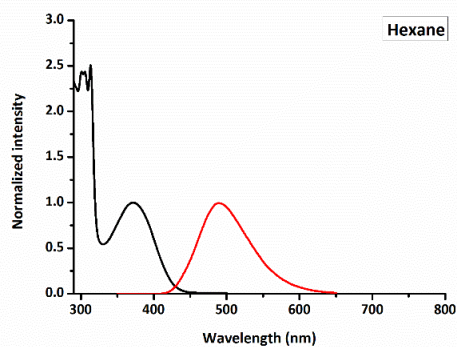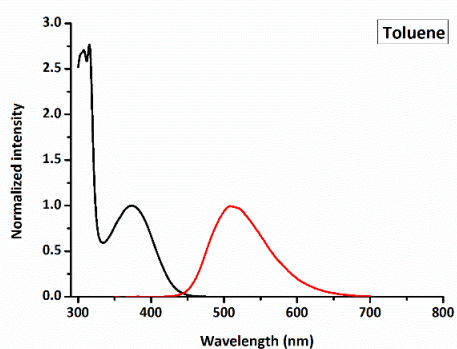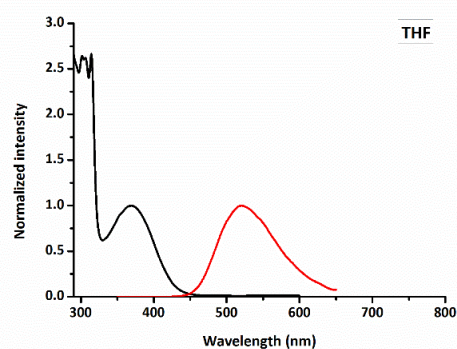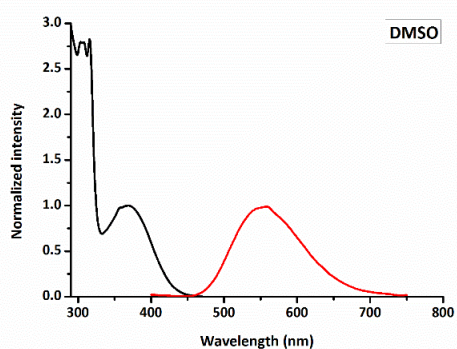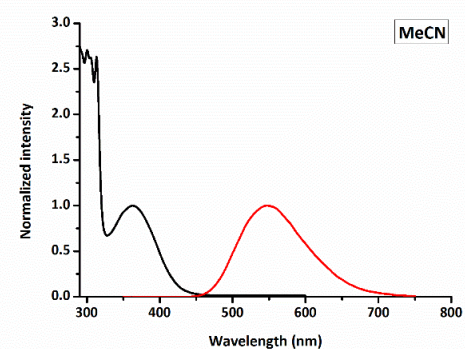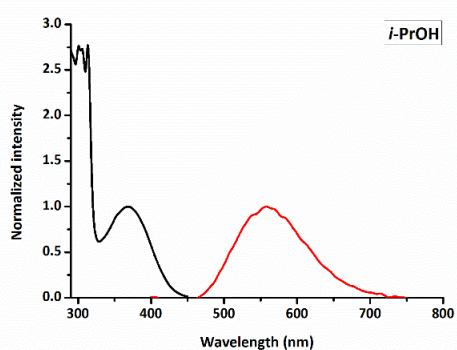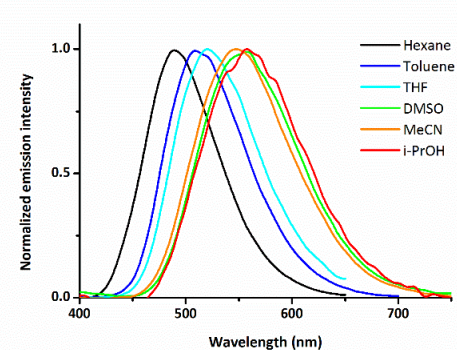

**Figure S5:** Normalized UV absorption (black) and emission (red) spectra of **5** in various solvents. The bottom right spectrum shows the combined emission spectra to visualize solvatochromism.



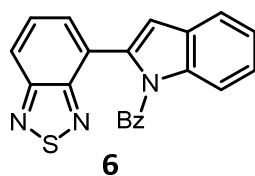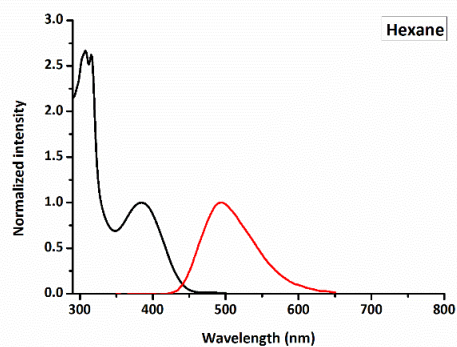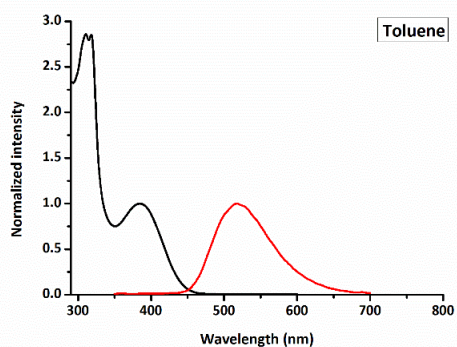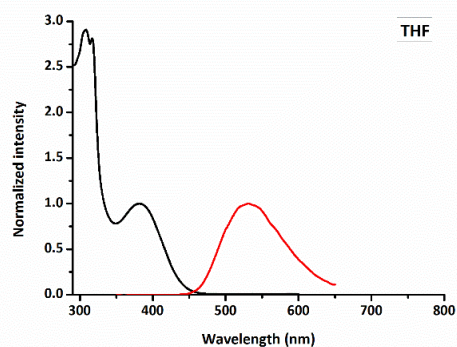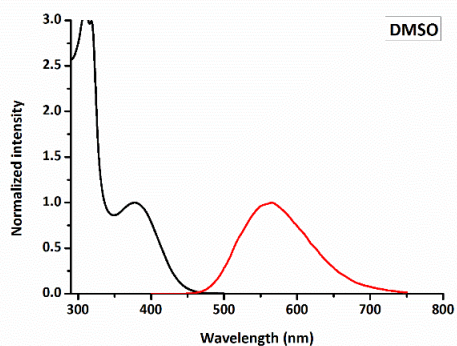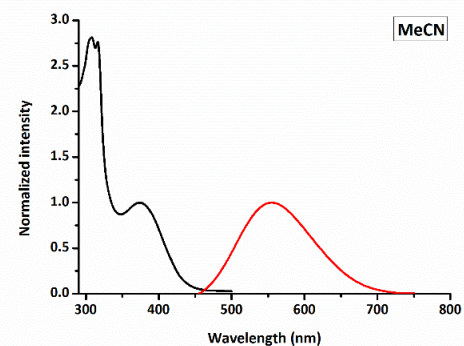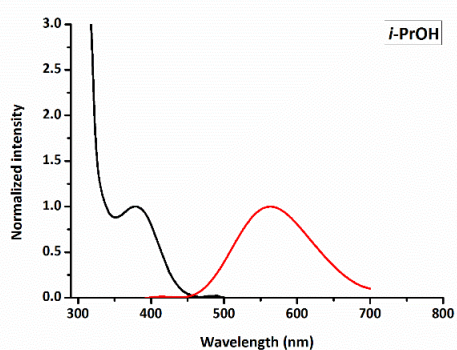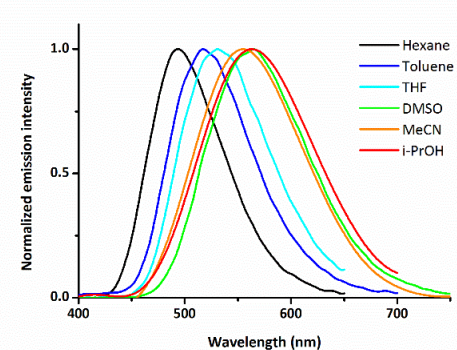

**Figure S6:** Normalized UV absorption (black) and emission (red) spectra of **6** in various solvents. The bottom right spectrum shows the combined emission spectra to visualize solvatochromism.

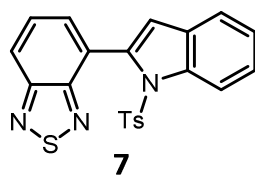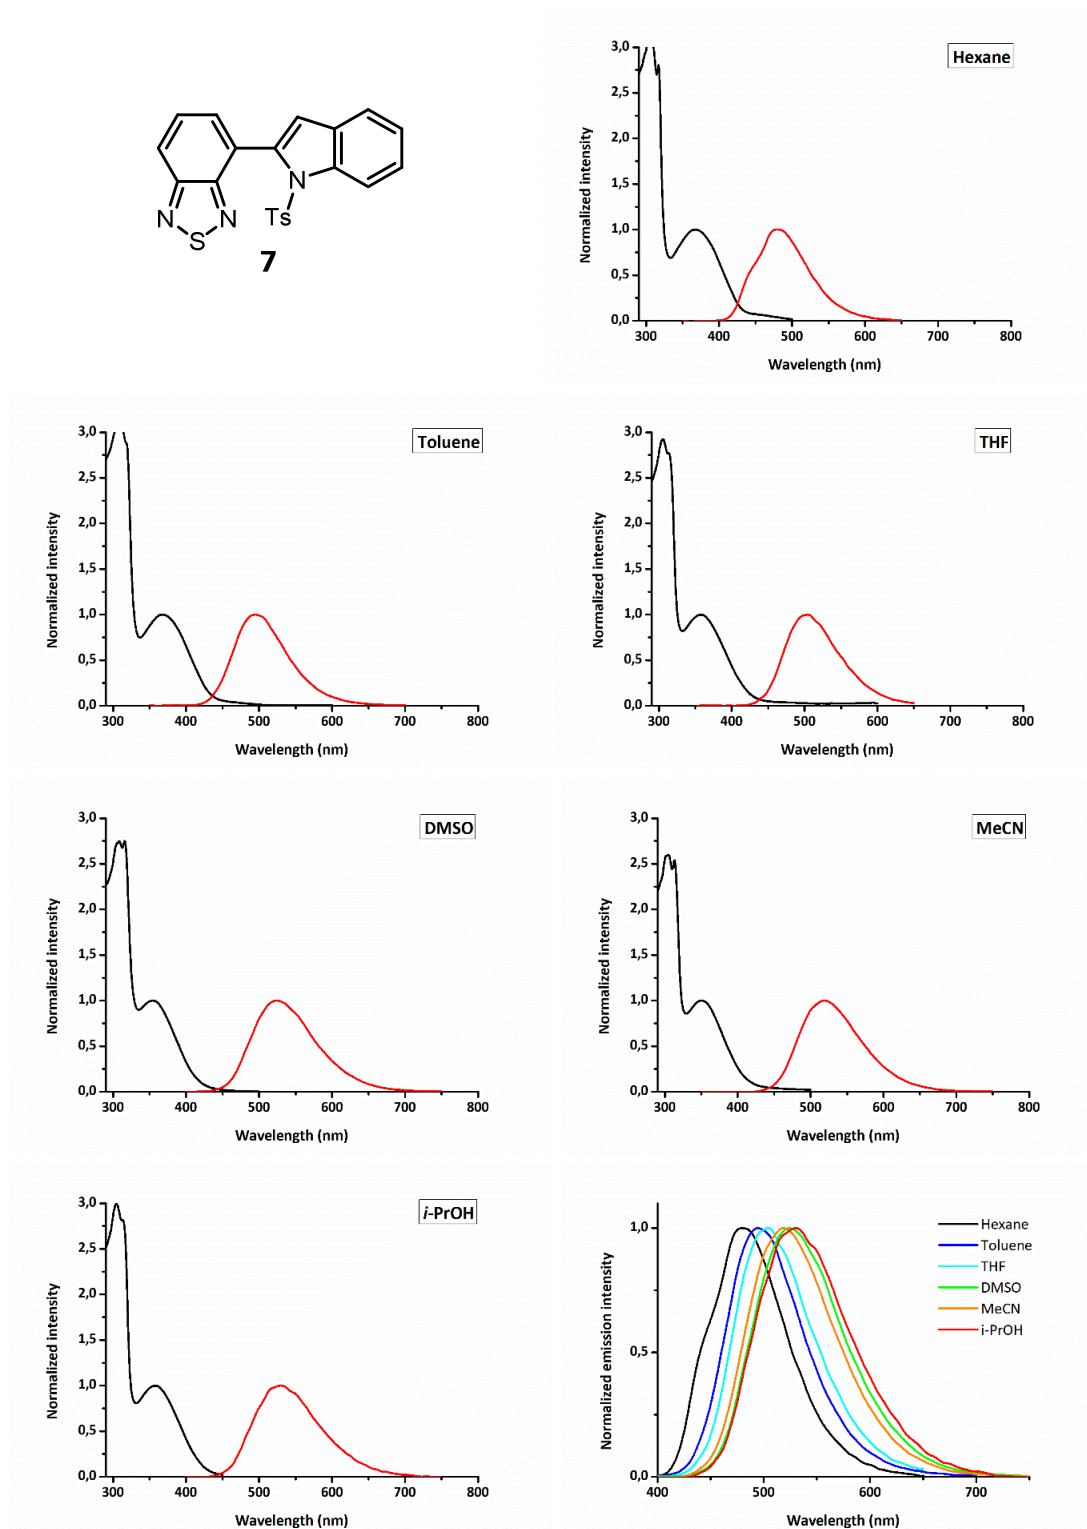

**Figure S7:** Normalized UV absorption (black) and emission (red) spectra of **7** in various solvents. The bottom right spectrum shows the combined emission spectra to visualize solvatochromism.

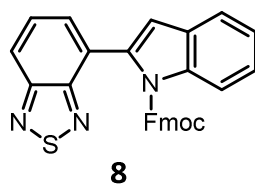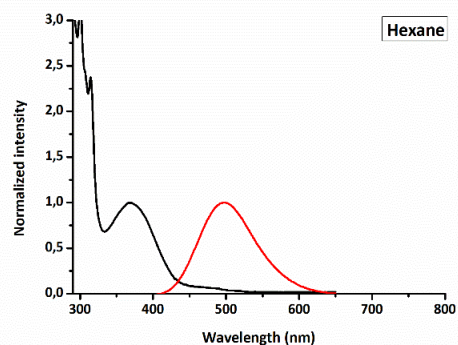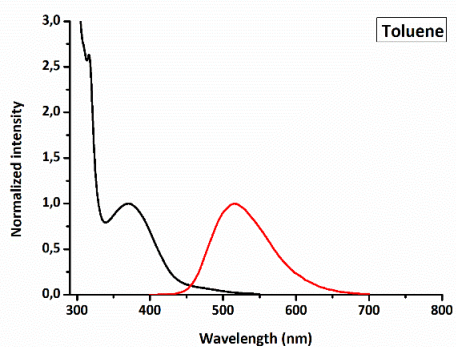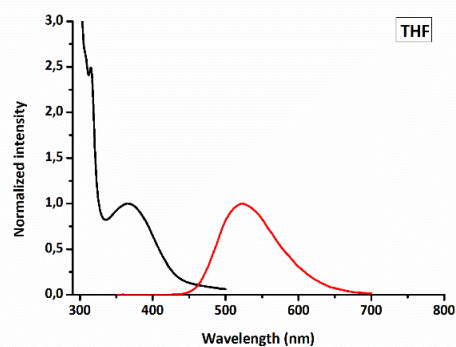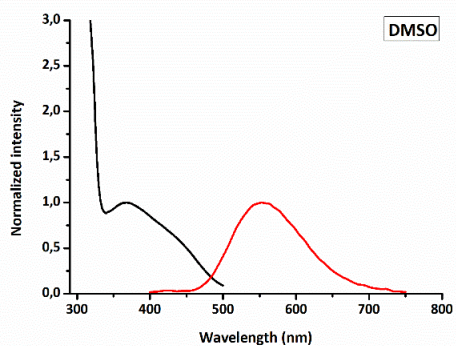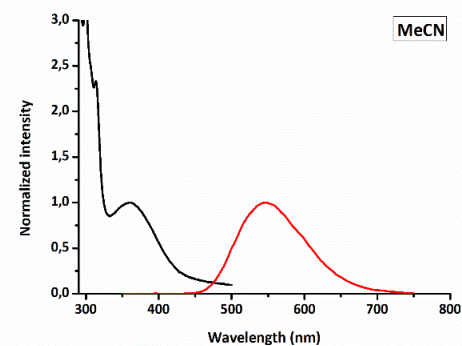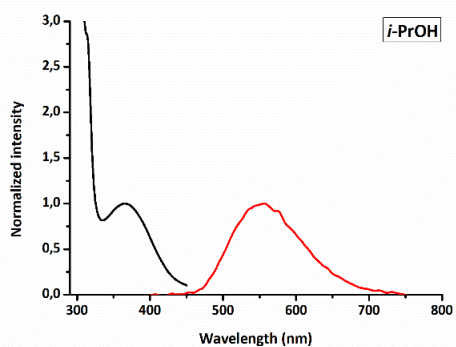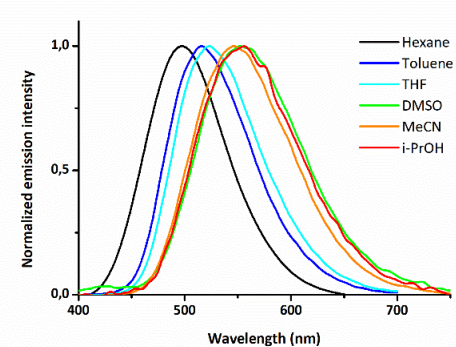

**Figure S8:** Normalized UV absorption (black) and emission (red) spectra of **8** in various solvents. The bottom right spectrum shows the combined emission spectra to visualize solvatochromism.

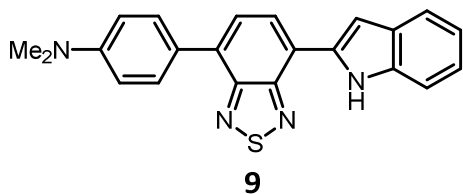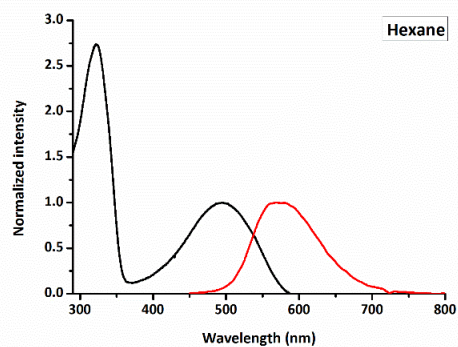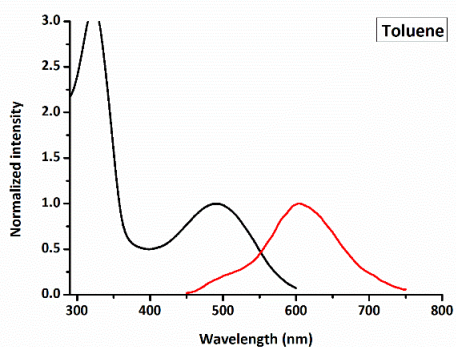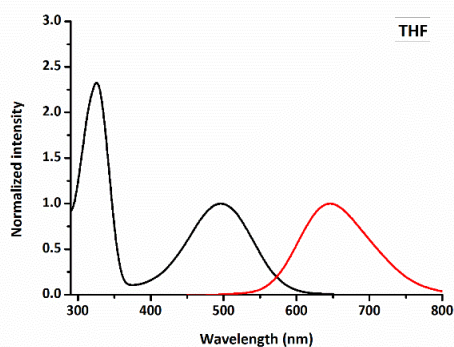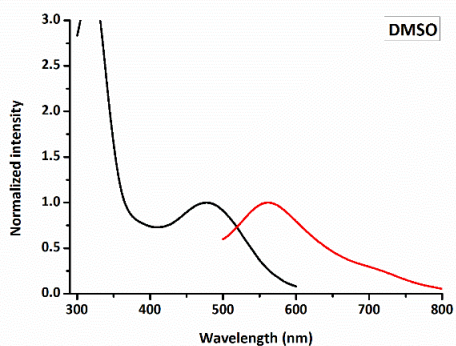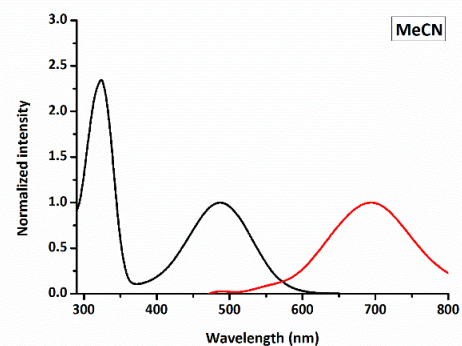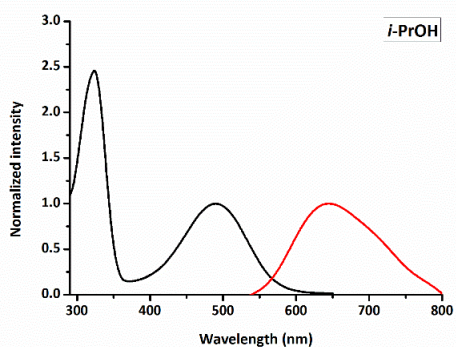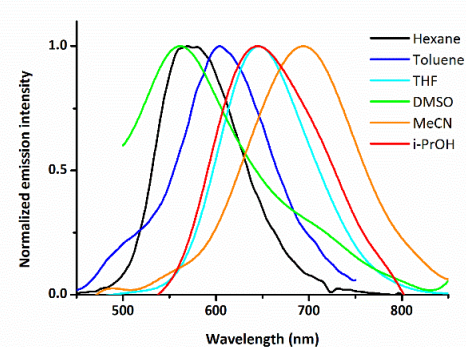

**Figure S9:** Normalized UV absorption (black) and emission (red) spectra of **9** in various solvents. The bottom right spectrum shows the combined emission spectra to visualize solvatochromism.

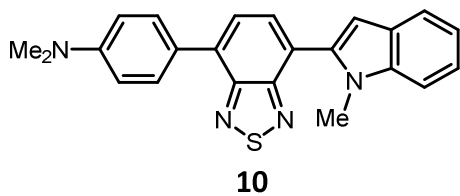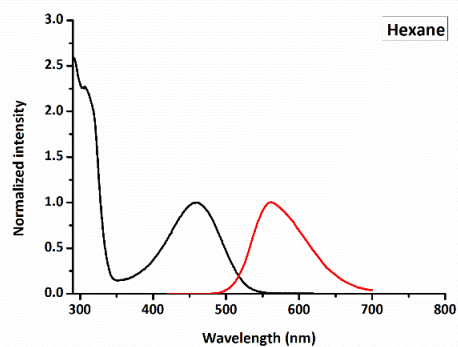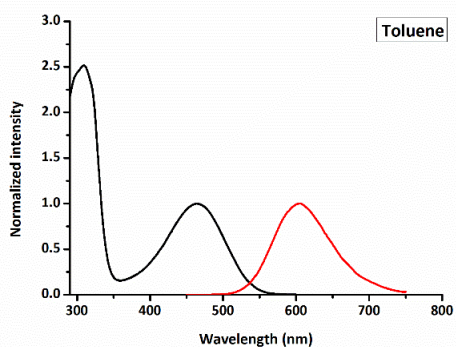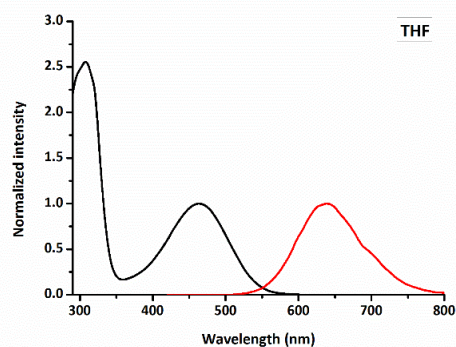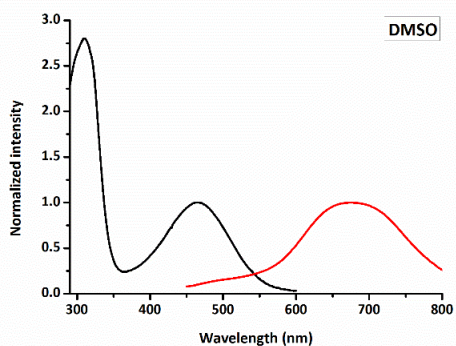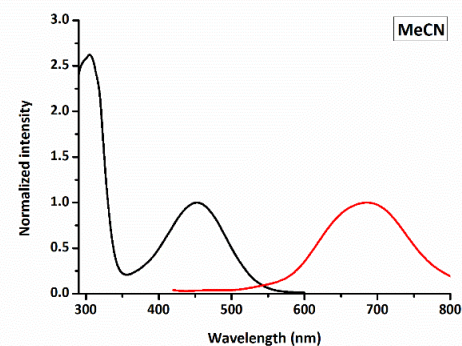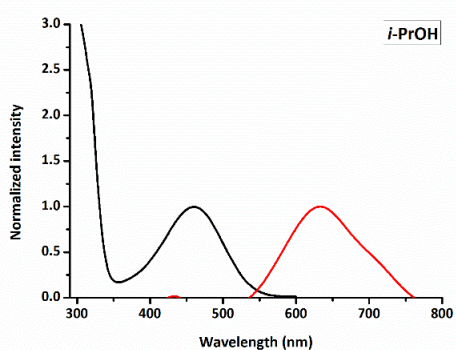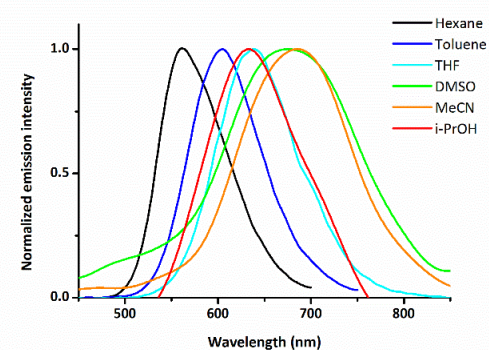

**Figure S10:** Normalized UV absorption (black) and emission (red) spectra of **10** in various solvents. The bottom right spectrum shows the combined emission spectra to visualize solvatochromism.

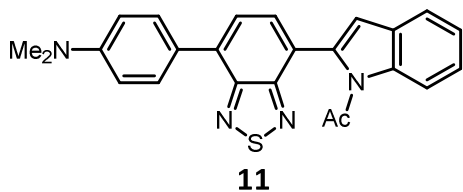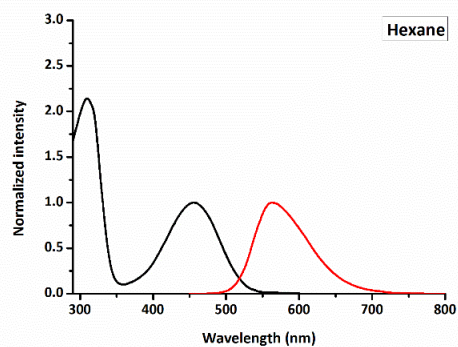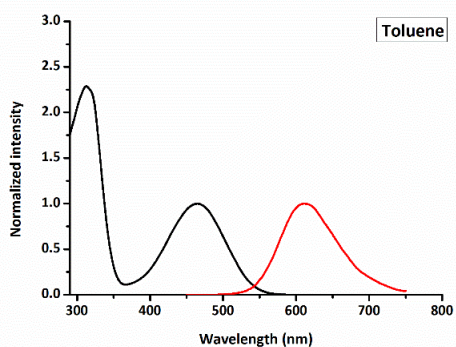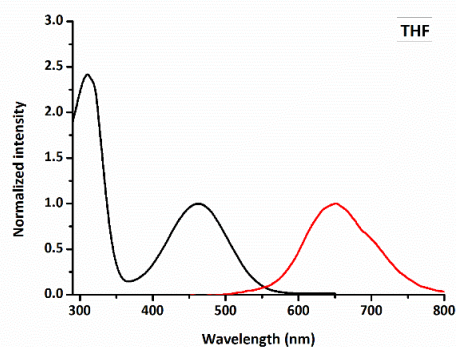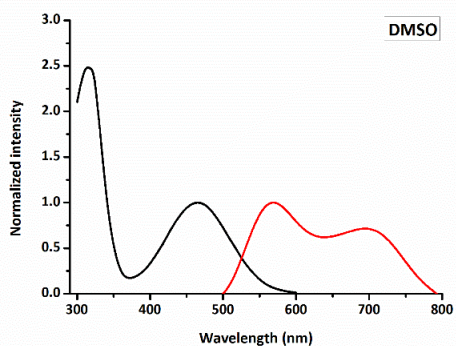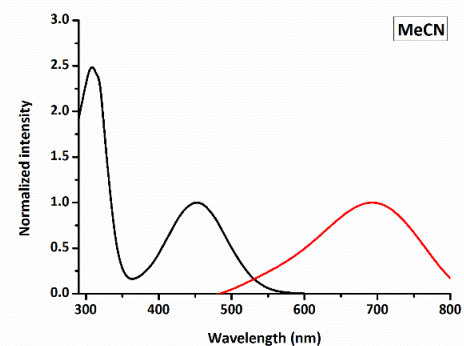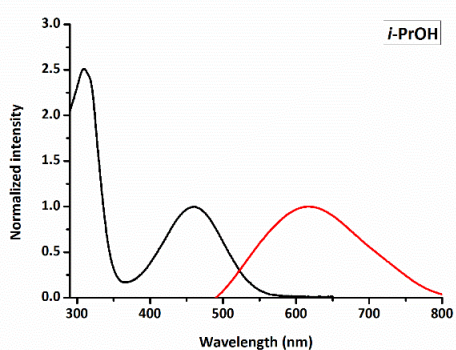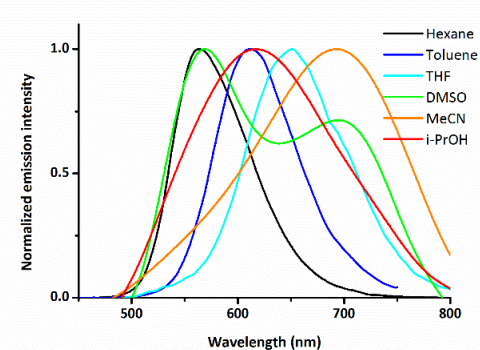

**Figure S11:** Normalized UV absorption (black) and emission (red) spectra of **11** in various solvents. The bottom right spectrum shows the combined emission spectra to visualize solvatochromism.

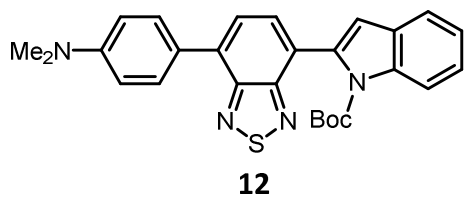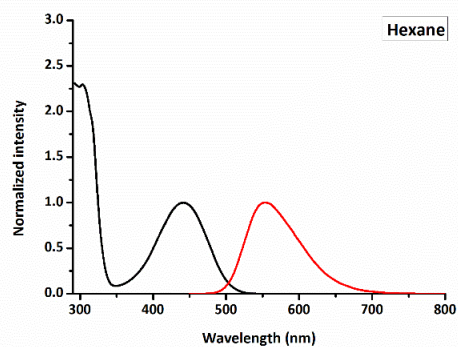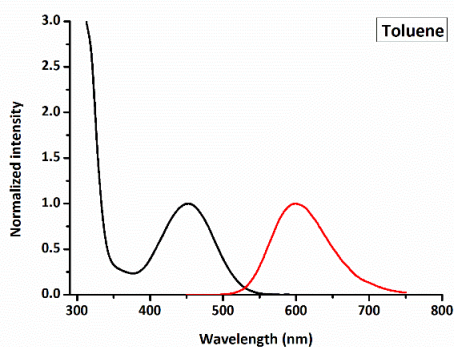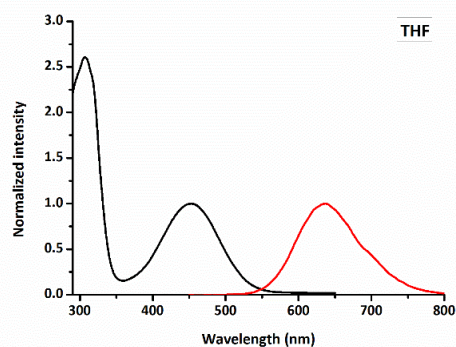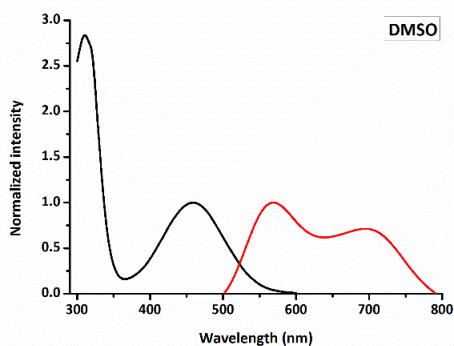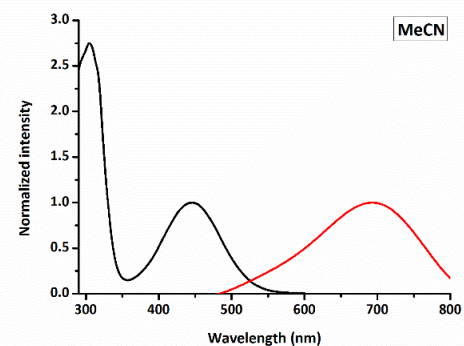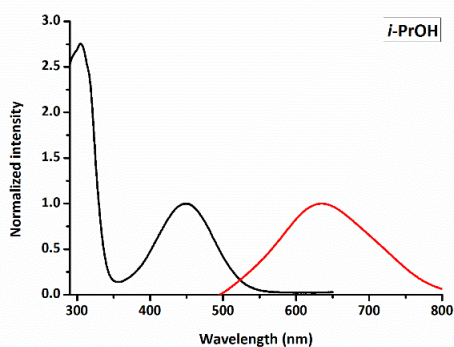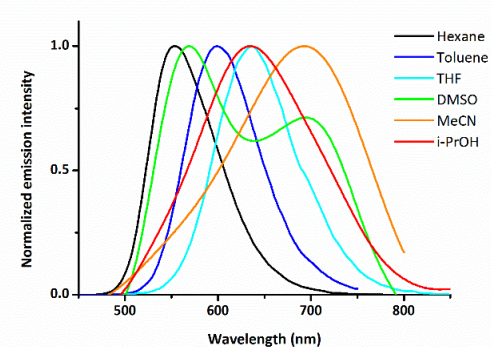

**Figure S12:** Normalized UV absorption (black) and emission (red) spectra of **12** in various solvents. The bottom right spectrum shows the combined emission spectra to visualize solvatochromism.

### III – Lippert-Mataga plots

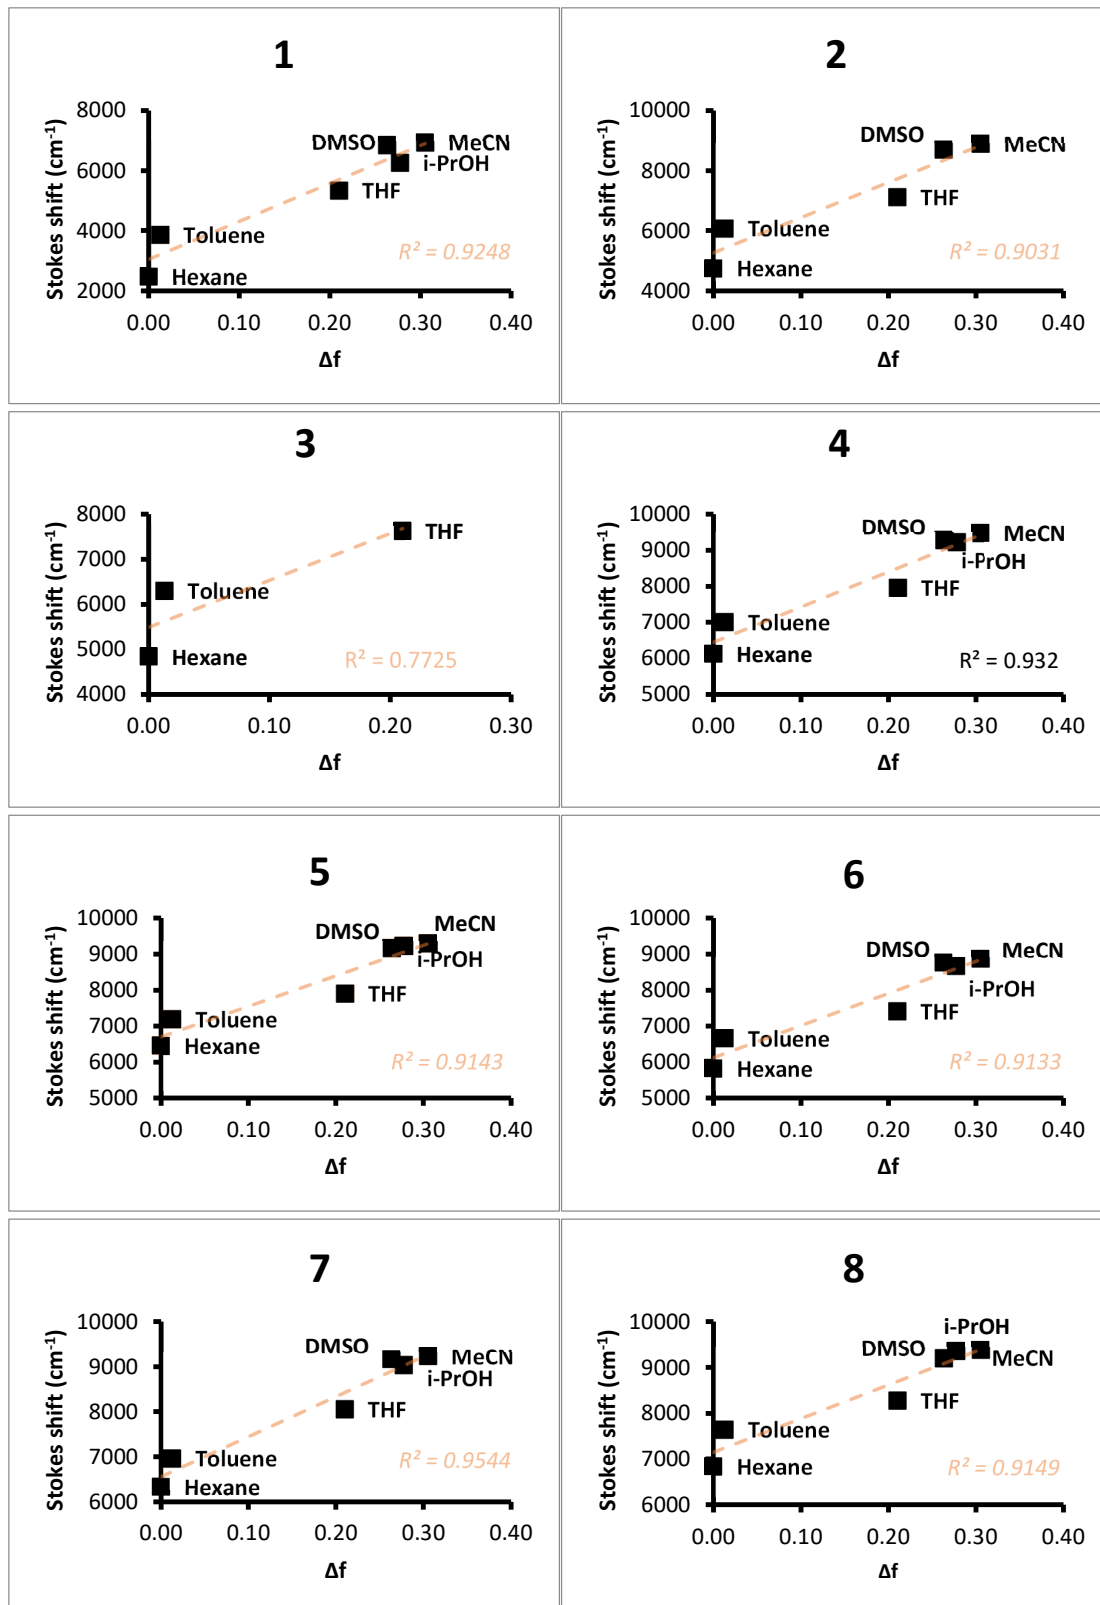

Figure S13: Lippert-Mataga plots of the monosubstituted compounds 1-8.



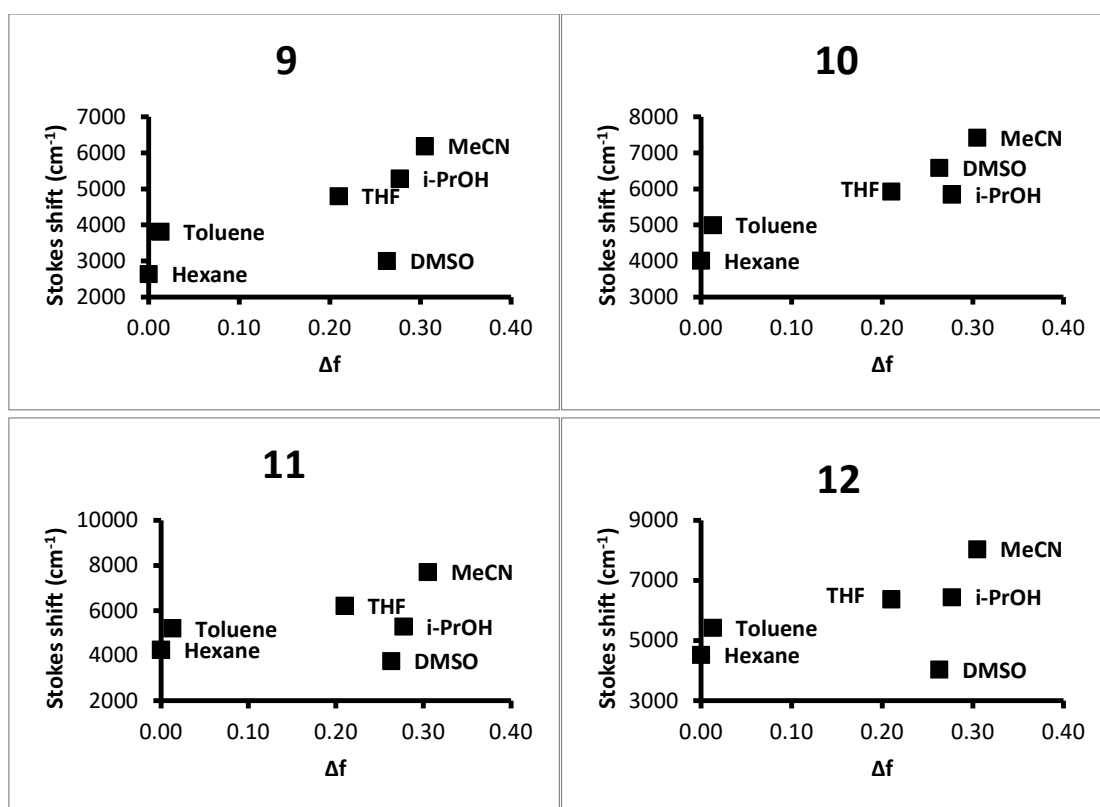

**Figure S14:** Lippert-Mataga plots of the disubstituted compounds 9-12. Linear correlations are not shown due to the presence of data points that deviate from the apparent trend.

#### IV – Additional cell staining images

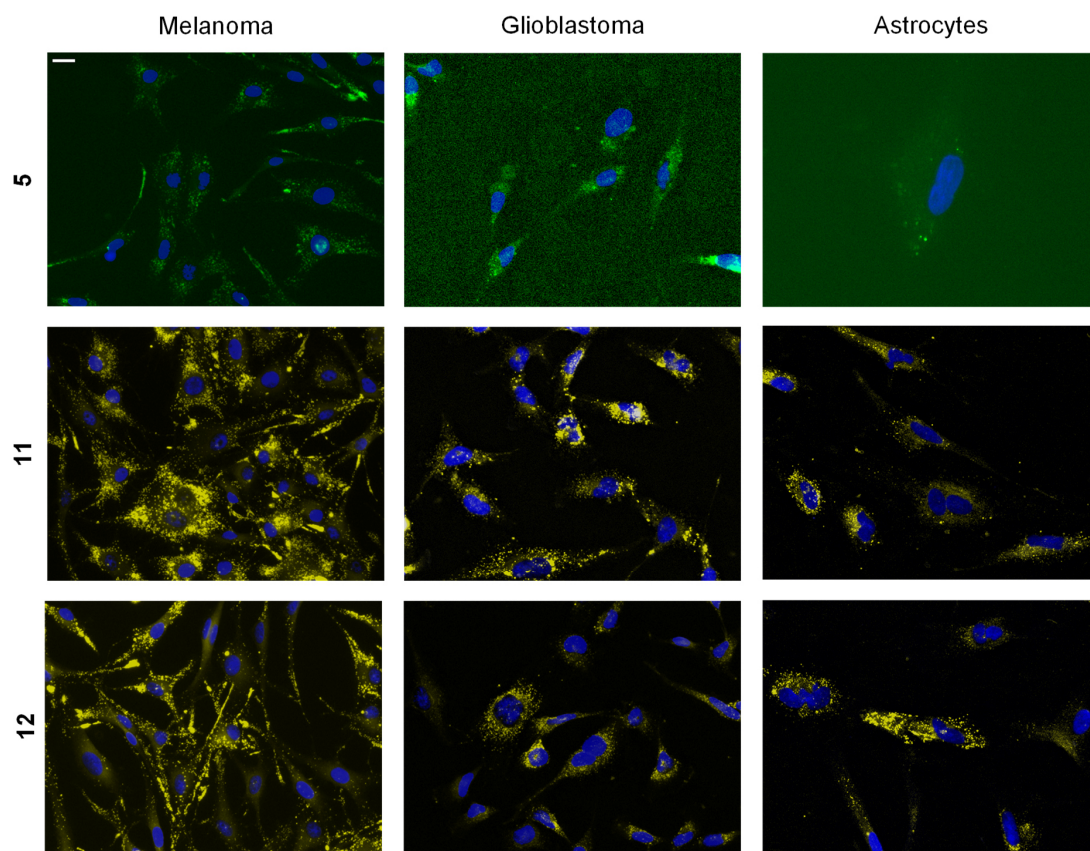

**Figure S15:** Staining of melanoma (SK-MEL-28, left), glioblastoma (U1242MG, middle) and normal human astrocytes (NHA, right) with **5**, **11** and **12** (10  $\mu$ M, top and bottom). Staining was performed on live cells, which were fixated after 24 h incubation. Cell nuclei were stained with DAPI (seen in blue). Scale bar: 20  $\mu$ m.

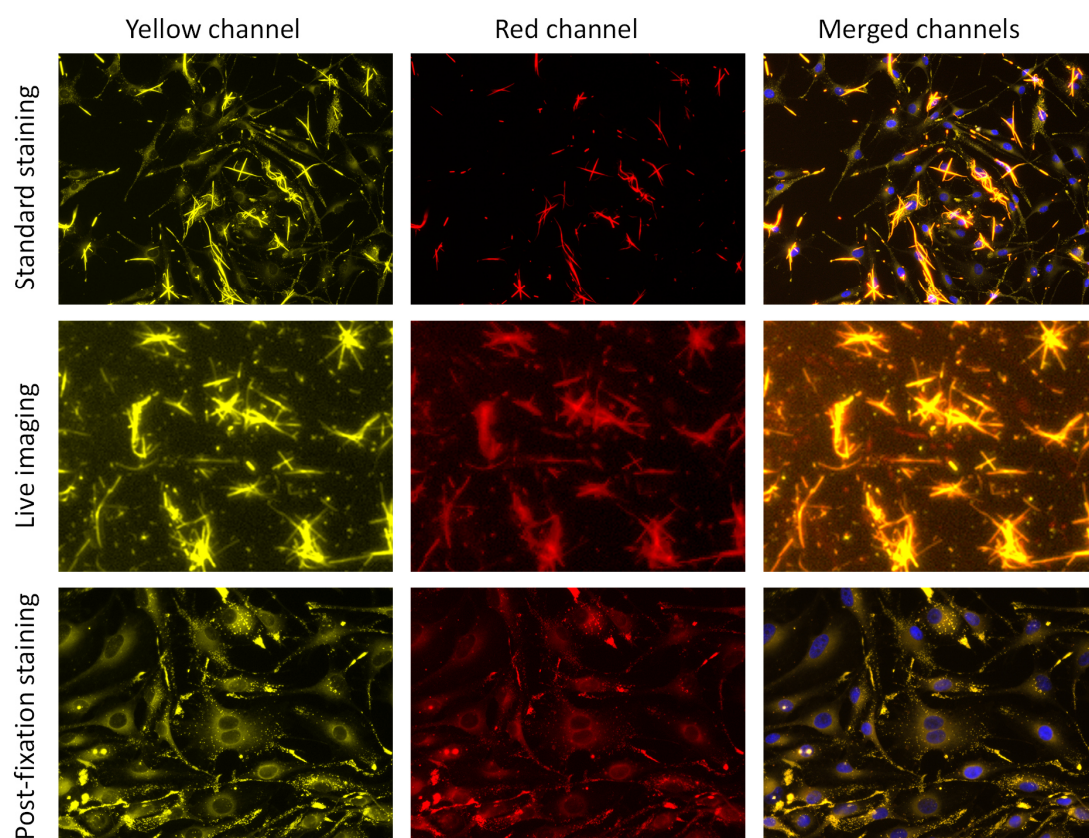

**Figure S16:** Imaging of melanoma (SK-MEL-28) cells with compound **9** following various staining protocols. Top panel: standard protocol used in this study: 10  $\mu$ M in live cells, 24 h incubation time, then fixation and imaging. Middle panel: 10  $\mu$ M in live cells, 24 h incubation, then imaging. Bottom panel: cells were fixated, then incubated with 10  $\mu$ M of the compound for 30 min, then imaging.

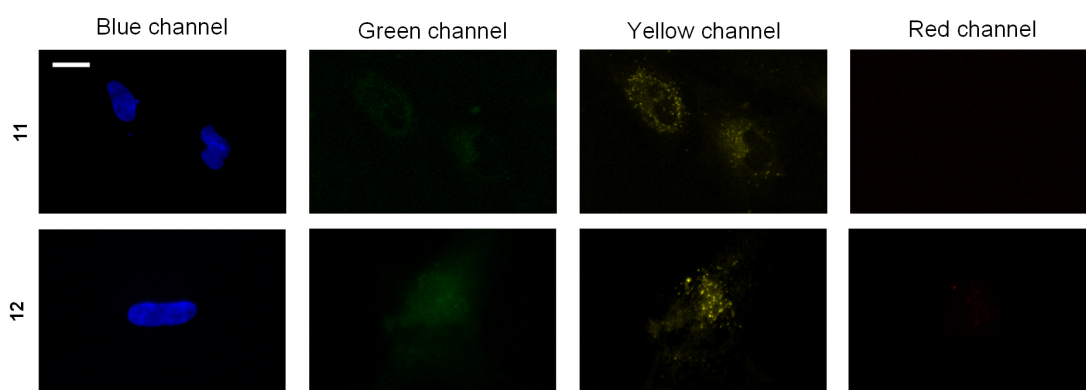

**Figure S17:** Imaging of normal human astrocytes (NHA) with compounds **11** and **12** (10  $\mu$ M) in different microscope channels. Blue (Ex 325-375nm, Em 435-485 nm); green (Ex 460-500 nm, Em 512-542 nm); yellow (Ex 532-558 nm, Em 570-640 nm) and red (Ex 590-650nm, Em 662-738nm). Staining was performed on live cells, which were fixated after 24 h incubation. Cell nuclei were stained with DAPI (seen in blue). Scale bar: 20  $\mu$ m.

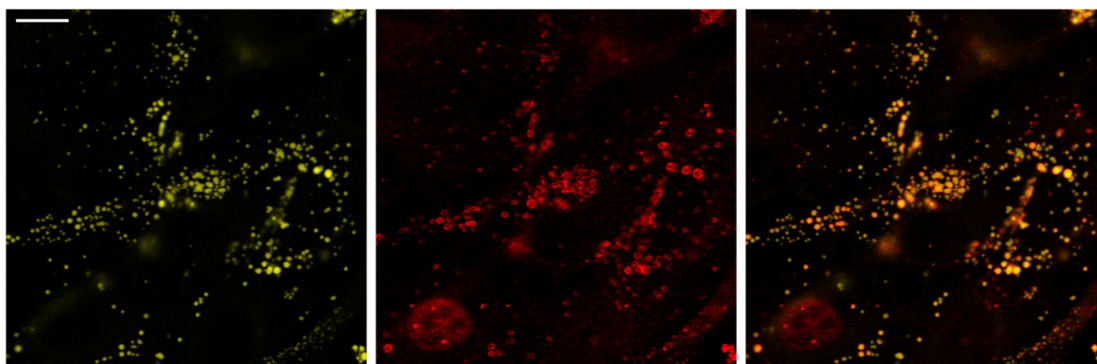

**Figure S18:** Confocal fluorescence microscopy images of compound **11** (10  $\mu$ M, 24 h) and the lipid droplet associated protein adipophilin in melanoma cells (SK-MEL-28). Staining was performed on living cells, which were fixated directly after the incubation and further processed for immunofluorescence. Scale bar: 10  $\mu$ m. The image to the left show compound **11** in yellow (ex 488 nm; em >490 nm), the image in the middle show the anti-adipophilin antibody in red (ex 639 nm; em >600 nm), and the image to the right show merged images to visualize the colocalization of compound **11** and adipophilin.

## V – Computational Studies Details

### 1 - Method

Geometry optimizations without symmetry constraints were carried out with the Gaussian 16 software (revision A.03),<sup>11</sup> using the hybrid M06 functional, with a polarized continuum model (PCM) for the corresponding solvents (*n*-hexane, PhMe, THF, isopropanol, MeOH, MeCN, DMSO and H<sub>2</sub>O).<sup>12</sup> The 6-31g\*<sup>13-15</sup> basis set is used for all atoms. This combination of functional and basis set has been previously used to investigate structurally similar compounds.<sup>16</sup>

In all cases, optimization yielded structures with singlet ground states ( $S_0$ ). Frequency calculations were performed at the same level of theory to ensure that the optimized structures were located at a potential energy surface minimum by the absence of imaginary frequencies. Stability calculations were also performed for all optimized structures to ensure that all wavefunctions were stable. Vertical excitation energies were calculated using time-dependent density functional theory (TD-DFT) at the same level of theory with a PCM for the appropriate solvents. In all cases, the vertical excitation transitions are HOMO  $\rightarrow$  LUMO transitions.

## 2 - Method validation by reproducing reported work:<sup>16</sup>

**Table S1:** Comparison between **BTD-(OMe)<sub>2</sub>Ph** modelled in acetonitrile from Ref. [16] and this work.  $r_{D-A}$  is defined as the C-C bond distance that links the two aromatic rings (donor and acceptor) together.  $\theta_{D-A}$  is defined as the torsional angle about the same C-C bond.

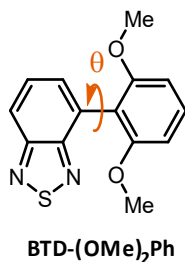

| Entries   | $r_{D-A}$ (Å) | $\theta_{D-A}$ (°) | $\lambda$ (nm) | $E$ (cm <sup>-1</sup> ) | $f$    | Major contribution to transition |
|-----------|---------------|--------------------|----------------|-------------------------|--------|----------------------------------|
| Ref. [16] | 1.48          | 55.4               | 373            | 26810                   | 0.12   | HOMO → LUMO                      |
| This work | 1.4823        | 56.4               | 372.05         | 26878                   | 0.1198 | HOMO → LUMO                      |

Employing computational details from the methods section, **BTD-(OMe)<sub>2</sub>Ph** was successfully optimized, yielding a structure with a singlet ground state ( $S_0$ ). This wavefunction is stable and contains no imaginary frequencies (Lowest frequency: 35.5617 cm<sup>-1</sup>).

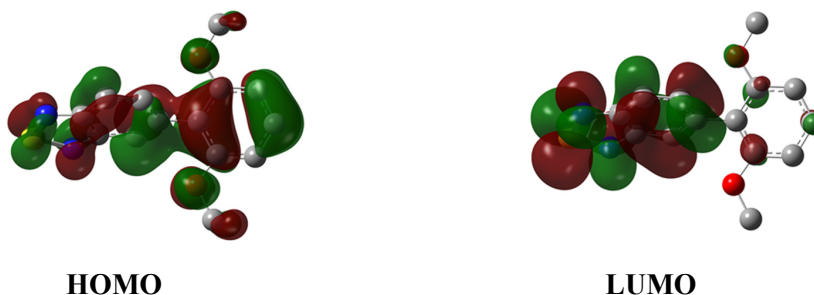

**Figure S18:** HOMO and LUMO surfaces (Isovalue: 0.02) at the optimized  $S_0$  geometries of **BTD-(OMe)<sub>2</sub>Ph**

**Conclusion:** Although minor discrepancies were observed in the optimized structure and TD-DFT calculations of **BTD-(OMe)<sub>2</sub>Ph**, the method used in these calculations yielded results that match well to those found in reference [16].

The frontier orbitals associated with the predicted transitions also match well to those found in Table S16 of Ref. [16], even though a different functional was employed (M06 in this work, B3LYP in report). In addition, computations in different solvents yielded near identical HOMO and LUMO.

### 3.1 – Calculations for 1 and 9

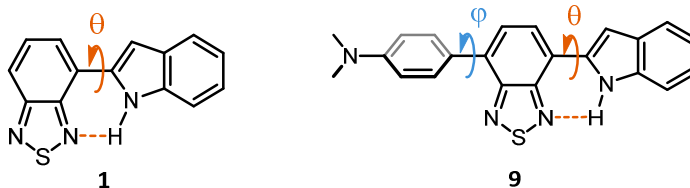

**Table S2:** Compound **1** modelled in various solvents.

| Solvent          | Lowest frequency (cm <sup>-1</sup> ) | r <sub>In-BTD</sub> (Å) | θ <sub>In-BTD</sub> (°) | λ (nm) | E (cm <sup>-1</sup> ) | f      |
|------------------|--------------------------------------|-------------------------|-------------------------|--------|-----------------------|--------|
| <i>n</i> -hexane | 39.4140                              | 1.4523                  | 0.0                     | 507.26 | 19714                 | 0.2352 |
| PhMe             | 39.8535                              | 1.4526                  | 0.0                     | 506.23 | 19754                 | 0.2488 |
| THF              | 40.0529                              | 1.4534                  | 0.0                     | 494.76 | 20212                 | 0.2426 |
| <i>i</i> PrOH    | 39.3243                              | 1.4537                  | 0.0                     | 490.59 | 20384                 | 0.2410 |
| MeOH             | 39.0049                              | 1.4538                  | 0.0                     | 488.7  | 20462                 | 0.2355 |
| MeCN             | 38.9602                              | 1.4538                  | 0.0                     | 488.85 | 20456                 | 0.2375 |
| DMSO             | 38.8421                              | 1.4539                  | 0.0                     | 489.74 | 20419                 | 0.2460 |
| H <sub>2</sub> O | 38.6778                              | 1.4539                  | 0.0                     | 487.89 | 20496                 | 0.2365 |

**Table S3:** Compound **9** modelled in various solvents.

| Solvent          | Lowest frequency (cm <sup>-1</sup> ) | r <sub>In-BTD</sub> (Å) | θ <sub>In-BTD</sub> (°) | r <sub>DMA-BTD</sub> (Å) | φ <sub>DMA-BTD</sub> (°) | λ (nm) | E (cm <sup>-1</sup> ) | f      |
|------------------|--------------------------------------|-------------------------|-------------------------|--------------------------|--------------------------|--------|-----------------------|--------|
| <i>n</i> -hexane | 20.3619                              | 1.4514                  | 0.9                     | 1.4660                   | 31.7                     | 587.96 | 17008                 | 0.4716 |
| PhMe             | 20.7012                              | 1.4516                  | 1.0                     | 1.4660                   | 31.8                     | 589.67 | 16959                 | 0.4922 |
| THF              | 20.8523                              | 1.4522                  | 1.0                     | 1.4660                   | 32.1                     | 583.68 | 17133                 | 0.4859 |
| <i>i</i> PrOH    | 20.9182                              | 1.4525                  | 0.9                     | 1.4661                   | 32.2                     | 581.43 | 17199                 | 0.4838 |
| MeOH             | 20.8821                              | 1.4525                  | 0.8                     | 1.4661                   | 32.2                     | 579.78 | 17248                 | 0.4759 |
| MeCN             | 20.9153                              | 1.4525                  | 0.8                     | 1.4661                   | 32.2                     | 580.1  | 17238                 | 0.4788 |
| DMSO             | 21.0444                              | 1.4526                  | 0.8                     | 1.4661                   | 32.2                     | 581.77 | 17189                 | 0.4912 |
| H <sub>2</sub> O | 20.9181                              | 1.4526                  | 0.7                     | 1.4661                   | 32.3                     | 579.49 | 17257                 | 0.4774 |

**Conclusion:** For **1** the HOMO is best described as a π\* combination of the BTD and indole fragments, while the LUMO is predominantly BTD-based.

Similar to **1**, the LUMO of **9** is predominantly BTD-based. The HOMO is a π\* combination of the BTD and indole fragments, as well as delocalization onto the dimethylaniline (DMA) system. This was also observed in Ref. [16].

### 3.2 - Effects of *N*-methylation - Calculations for **2** and **10**

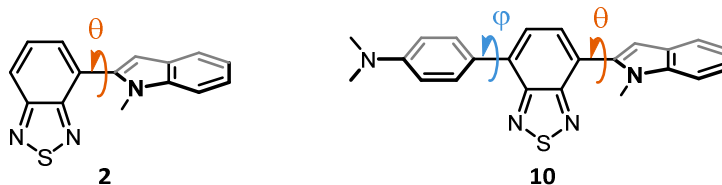

**Table S4:** Compound **2** modelled in various solvents.

| Solvent           | Lowest frequency (cm <sup>-1</sup> ) | r <sub>In-BTD</sub> (Å) | θ <sub>In-BTD</sub> (°) | λ (nm) | E (cm <sup>-1</sup> ) | f      |
|-------------------|--------------------------------------|-------------------------|-------------------------|--------|-----------------------|--------|
| <i>n</i> -hexane  | 43.9236                              | 1.4609                  | 44.9                    | 477.65 | 20936                 | 0.1348 |
| PhMe              | 43.7462                              | 1.4611                  | 45.1                    | 475.87 | 21014                 | 0.1415 |
| THF               | 42.3586                              | 1.4617                  | 45.9                    | 465.7  | 21473                 | 0.1335 |
| <sup>i</sup> PrOH | 41.5062                              | 1.4619                  | 46.3                    | 461.72 | 21658                 | 0.1304 |
| MeOH              | 41.2778                              | 1.4620                  | 46.5                    | 460.27 | 21726                 | 0.1266 |
| MeCN              | 41.2819                              | 1.4620                  | 46.5                    | 460.24 | 21728                 | 0.1277 |
| DMSO              | 41.2330                              | 1.4620                  | 46.5                    | 460.45 | 21718                 | 0.1323 |
| H <sub>2</sub> O  | 41.1790                              | 1.4620                  | 46.6                    | 459.32 | 21771                 | 0.1267 |

**Table S5:** Compound **10** modelled in various solvents.

| Solvent           | Lowest frequency (cm <sup>-1</sup> ) | r <sub>In-BTD</sub> (Å) | θ <sub>In-BTD</sub> (°) | r <sub>DMA-BTD</sub> (Å) | φ <sub>DMA-BTD</sub> (°) | λ (nm) | E (cm <sup>-1</sup> ) | f      |
|-------------------|--------------------------------------|-------------------------|-------------------------|--------------------------|--------------------------|--------|-----------------------|--------|
| <i>n</i> -hexane  | 20.3968                              | 1.4603                  | 44.8                    | 1.4673                   | 31.6                     | 533.72 | 18736                 | 0.4142 |
| PhMe              | 20.1403                              | 1.4604                  | 45.0                    | 1.4673                   | 31.6                     | 535.63 | 18670                 | 0.4291 |
| THF               | 19.2585                              | 1.4609                  | 45.9                    | 1.4674                   | 32.1                     | 534.1  | 18723                 | 0.4129 |
| <sup>i</sup> PrOH | 18.6856                              | 1.4612                  | 46.4                    | 1.4674                   | 32.4                     | 533.39 | 18748                 | 0.4053 |
| MeOH              | 18.5332                              | 1.4612                  | 46.6                    | 1.4674                   | 32.4                     | 532.49 | 18780                 | 0.3973 |
| MeCN              | 18.5164                              | 1.4612                  | 46.6                    | 1.4674                   | 32.5                     | 532.73 | 18771                 | 0.3992 |
| DMSO              | 18.4590                              | 1.4612                  | 46.6                    | 1.4674                   | 32.5                     | 533.93 | 18729                 | 0.4083 |
| H <sub>2</sub> O  | 17.8578                              | 1.4606                  | 45.4                    | 1.4669                   | 32.3                     | 532.18 | 18791                 | 0.4058 |

**Conclusion:** The methylated indole compounds **2** and **10** exhibit twisting in the donor and acceptor rings by *ca.* 45° (θ<sub>In-BTD</sub>), while their non-methylated counterparts are nearly completely planar (θ<sub>In-BTD</sub> = 0°, see section 3.1).

The predicted vertical excitation energies (**E**) of these methylated analogues are blue shifted and lower in oscillator strength (**f**) in comparison to the compounds lacking methylation. In either case, the predicted transitions originate from HOMOs (π\* combination of the BTD and indole/dimethylaniline fragments) and LUMOs (predominantly BTD-based) that are similar in composition.

### 3.3 - Effects of *N*-isopropyl substitution – Calculations for **3**

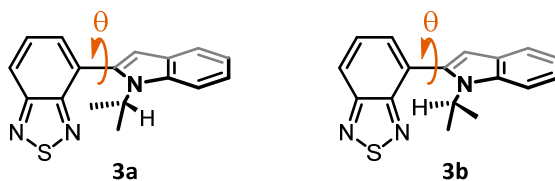

**Table S6:** Isomer **3a** modelled in various solvents.

| Solvent          | Lowest frequency (cm <sup>-1</sup> ) | r <sub>In-BTD</sub> (Å) | θ <sub>In-BTD</sub> (°) | λ (nm) | E (cm <sup>-1</sup> ) | f      |
|------------------|--------------------------------------|-------------------------|-------------------------|--------|-----------------------|--------|
| <i>n</i> -hexane | 33.4685                              | 1.4687                  | 57.9                    | 475.87 | 21014                 | 0.0736 |
| PhMe             | 32.7406                              | 1.4688                  | 58.3                    | 473.07 | 21139                 | 0.0760 |
| THF              | 30.4116                              | 1.4694                  | 60.1                    | 461.45 | 21671                 | 0.0679 |
| <i>i</i> PrOH    | 31.0566                              | 1.4696                  | 61.0                    | 456.87 | 21888                 | 0.0643 |
| MeOH             | 31.1637                              | 1.4697                  | 61.2                    | 455.43 | 21957                 | 0.0620 |
| MeCN             | 31.1411                              | 1.4694                  | 61.2                    | 455.33 | 21962                 | 0.0623 |
| DMSO             | 31.0643                              | 1.4697                  | 61.4                    | 455.18 | 21969                 | 0.0643 |
| H <sub>2</sub> O | 30.8961                              | 1.4697                  | 61.5                    | 454.34 | 22010                 | 0.0614 |

**Table S7:** Isomer **3b** modelled in various solvents.

| Solvent          | Lowest frequency (cm <sup>-1</sup> ) | r <sub>In-BTD</sub> (Å) | θ <sub>In-BTD</sub> (°) | λ (nm) | E (cm <sup>-1</sup> ) | f      |
|------------------|--------------------------------------|-------------------------|-------------------------|--------|-----------------------|--------|
| <i>n</i> -hexane | 32.5775                              | 1.4642                  | 48.1                    | 478.42 | 20902                 | 0.1083 |
| PhMe             | 32.2296                              | 1.4644                  | 48.3                    | 476.02 | 21008                 | 0.1136 |
| THF              | 32.6952                              | 1.4651                  | 49.6                    | 464.34 | 21536                 | 0.1045 |
| <i>i</i> PrOH    | 32.7045                              | 1.4654                  | 50.2                    | 459.6  | 21758                 | 0.1013 |
| MeOH             | 32.6060                              | 1.4655                  | 50.3                    | 458    | 21834                 | 0.0982 |
| MeCN             | 32.5886                              | 1.4655                  | 50.3                    | 457.93 | 21837                 | 0.0989 |
| DMSO             | 32.5406                              | 1.4655                  | 50.4                    | 457.93 | 21837                 | 0.1026 |
| H <sub>2</sub> O | 32.4753                              | 1.4655                  | 50.5                    | 456.88 | 21888                 | 0.0980 |

**Conclusion:** The isopropylated compound **3** is predicted to exist as two isomers **3a** and **3b**. Compared to the methylated compound **2**, **3a** and **3b** display sharply increased torsion angles (θ<sub>In-BTD</sub>) of *ca.* 60° and 50°, respectively, which are the largest in the series. The predicted vertical excitation energies are virtually identical to those of the methylated analogue **2**. Isomer **3b** is predicted to be 2.0 kcal/mol lower in energy than **3a** in all solvent models. The predicted transitions originate from HOMOs (π\* combination of the BTD and indole fragments) and LUMOs (predominantly BTD-based) that are similar in composition.



### 3.3 - Effect of *N*-acylation - Calculations for 4 and 11

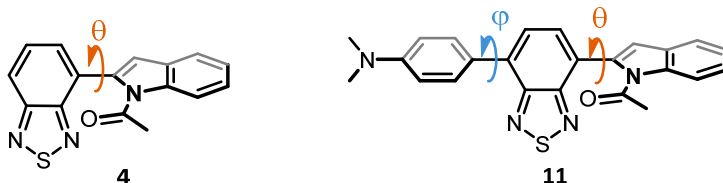

**Table S8:** Compound 4 modelled in various solvents.

| Solvent           | Lowest frequency (cm <sup>-1</sup> ) | r <sub>In-BTD</sub> (Å) | θ <sub>In-BTD</sub> (°) | λ (nm) | E (cm <sup>-1</sup> ) | f      |
|-------------------|--------------------------------------|-------------------------|-------------------------|--------|-----------------------|--------|
| <i>n</i> -hexane  | 26.0795                              | 1.4611                  | 47.0                    | 407.73 | 24526                 | 0.1887 |
| PhMe              | 25.3710                              | 1.4613                  | 47.1                    | 408.84 | 24459                 | 0.1978 |
| THF               | 15.9777                              | 1.4618                  | 47.6                    | 409.13 | 24442                 | 0.1834 |
| <sup>i</sup> PrOH | 18.9881                              | 1.4621                  | 48.0                    | 408.91 | 24455                 | 0.1781 |
| MeOH              | 19.6471                              | 1.4621                  | 48.1                    | 408.72 | 24467                 | 0.1729 |
| MeCN              | 19.7268                              | 1.4621                  | 48.1                    | 408.86 | 24458                 | 0.1743 |
| DMSO              | 19.9246                              | 1.4622                  | 48.1                    | 409.46 | 24422                 | 0.1804 |
| H <sub>2</sub> O  | 20.1738                              | 1.4622                  | 48.1                    | 408.93 | 24454                 | 0.1727 |

**Table S9:** Compound 11 modelled in various solvents.

| Solvent           | Lowest frequency (cm <sup>-1</sup> ) | r <sub>In-BTD</sub> (Å) | θ <sub>In-BTD</sub> (°) | r <sub>DMA-BTD</sub> (Å) | φ <sub>DMA-BTD</sub> (°) | λ (nm) | E (cm <sup>-1</sup> ) | f      |
|-------------------|--------------------------------------|-------------------------|-------------------------|--------------------------|--------------------------|--------|-----------------------|--------|
| <i>n</i> -hexane  | 17.5314                              | 1.4589                  | 45.0                    | 1.4673                   | 32.2                     | 511.48 | 19551                 | 0.4147 |
| PhMe              | 15.5658                              | 1.4591                  | 45.2                    | 1.4673                   | 32.2                     | 514.89 | 19422                 | 0.4260 |
| THF               | 16.1130                              | 1.4597                  | 45.9                    | 1.4673                   | 32.4                     | 519.49 | 19250                 | 0.4006 |
| <sup>i</sup> PrOH | 16.9643                              | 1.4599                  | 46.1                    | 1.4674                   | 32.5                     | 521.52 | 19175                 | 0.3916 |
| MeOH              | 17.1283                              | 1.4600                  | 46.2                    | 1.4674                   | 32.6                     | 521.39 | 19180                 | 0.3834 |
| MeCN              | 17.1224                              | 1.4600                  | 46.2                    | 1.4674                   | 32.6                     | 521.77 | 19166                 | 0.3854 |
| DMSO              | 17.1893                              | 1.4600                  | 46.2                    | 1.4674                   | 32.6                     | 523.12 | 19116                 | 0.3943 |
| H <sub>2</sub> O  | 17.2447                              | 1.4600                  | 46.2                    | 1.4674                   | 32.6                     | 522.08 | 19154                 | 0.3828 |

**Conclusion:** The acetylated (**4**, **11**) vs. methylated compounds (**2**, **10**) exhibited near-identical metrical parameters (r<sub>In-BTD</sub>, θ<sub>In-BTD</sub>).

The predicted vertical excitation energies (E) of these acetylated analogues are blue shifted in comparison to the methylated compounds. In all cases, the predicted transitions originate from HOMOs (π\* combination of the BTD and indole/dimethylaniline fragments) and LUMOs (predominantly BTD-based) that are similar in composition, with minimal contribution from the acetyl groups.

### 3.4 - Effect of *N*-benzoyl and *N*-Boc substitution – Calculations for 5, 6 and 12

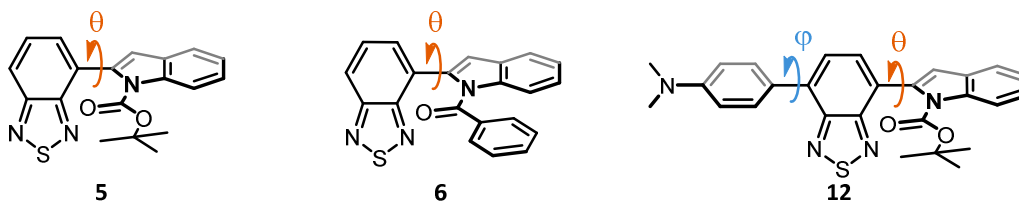

**Table S10:** Compound **5** modelled in various solvents.

| Solvent          | Lowest frequency (cm <sup>-1</sup> ) | r <sub>In-BTD</sub> (Å) | θ <sub>In-BTD</sub> (°) | λ (nm) | E (cm <sup>-1</sup> ) | f      |
|------------------|--------------------------------------|-------------------------|-------------------------|--------|-----------------------|--------|
| <i>n</i> -hexane | 25.7913                              | 1.4608                  | 46.0                    | 416.46 | 24012                 | 0.1894 |
| PhMe             | 18.8878                              | 1.4606                  | 45.5                    | 418.78 | 23879                 | 0.1995 |
| THF              | 18.1413                              | 1.4604                  | 44.6                    | 419.79 | 23821                 | 0.1900 |
| <i>i</i> PrOH    | 18.8551                              | 1.4602                  | 44.2                    | 420.53 | 23780                 | 0.1866 |
| MeOH             | 19.8422                              | 1.4603                  | 44.2                    | 420.24 | 23796                 | 0.1814 |
| MeCN             | 19.8341                              | 1.4603                  | 44.2                    | 420.39 | 23787                 | 0.1829 |
| DMSO             | 19.9803                              | 1.4603                  | 44.1                    | 421.06 | 23750                 | 0.1897 |
| H <sub>2</sub> O | 20.1250                              | 1.4603                  | 44.1                    | 420.44 | 23785                 | 0.1817 |

**Table S11:** Compound **6** modelled in various solvents.

| Solvent          | Lowest frequency (cm <sup>-1</sup> ) | r <sub>In-BTD</sub> (Å) | θ <sub>In-BTD</sub> (°) | λ (nm) | E (cm <sup>-1</sup> ) | f      |
|------------------|--------------------------------------|-------------------------|-------------------------|--------|-----------------------|--------|
| <i>n</i> -hexane | 28.6966                              | 1.4588                  | 41.7                    | 423.47 | 23614                 | 0.1846 |
| PhMe             | 28.9453                              | 1.4589                  | 41.7                    | 424.14 | 23577                 | 0.1945 |
| THF              | 29.2376                              | 1.4594                  | 41.8                    | 423.01 | 23640                 | 0.1839 |
| <i>i</i> PrOH    | 29.1687                              | 1.4595                  | 41.9                    | 422.83 | 23650                 | 0.1799 |
| MeOH             | 29.1552                              | 1.4596                  | 41.9                    | 422.5  | 23669                 | 0.1749 |
| MeCN             | 29.1505                              | 1.4596                  | 41.9                    | 422.64 | 23661                 | 0.1763 |
| DMSO             | 29.1381                              | 1.4595                  | 41.9                    | 423.24 | 23627                 | 0.1827 |
| H <sub>2</sub> O | 29.1208                              | 1.4596                  | 42.0                    | 422.59 | 23664                 | 0.1749 |

**Table S12:** Compound **12** modelled in various solvents.

| Solvent          | Lowest frequency (cm <sup>-1</sup> ) | r <sub>In-BTD</sub> (Å) | θ <sub>In-BTD</sub> (°) | r <sub>DMA-BTD</sub> (Å) | φ <sub>DMA-BTD</sub> (°) | λ (nm) | E (cm <sup>-1</sup> ) | f      |
|------------------|--------------------------------------|-------------------------|-------------------------|--------------------------|--------------------------|--------|-----------------------|--------|
| <i>n</i> -hexane | 16.8191                              | 1.4591                  | 45.1                    | 1.4675                   | 31.5                     | 509.52 | 19626                 | 0.4291 |
| PhMe             | 16.1529                              | 1.4591                  | 44.9                    | 1.4675                   | 31.6                     | 513.65 | 19469                 | 0.4412 |
| THF              | 15.5445                              | 1.4584                  | 42.9                    | 1.4672                   | 32.2                     | 524.27 | 19074                 | 0.4226 |
| <i>i</i> PrOH    | 17.1866                              | 1.4584                  | 42.5                    | 1.4672                   | 32.3                     | 526.88 | 18980                 | 0.4157 |
| MeOH             | 16.2517                              | 1.4584                  | 42.5                    | 1.4671                   | 32.4                     | 527.5  | 18957                 | 0.4073 |
| MeCN             | 16.2746                              | 1.4584                  | 42.4                    | 1.4671                   | 32.4                     | 527.91 | 18943                 | 0.4095 |
| DMSO             | 16.3174                              | 1.4584                  | 42.4                    | 1.4671                   | 32.4                     | 529.44 | 18888                 | 0.4192 |
| H <sub>2</sub> O | 16.3541                              | 1.4584                  | 42.4                    | 1.4671                   | 32.4                     | 528.45 | 18923                 | 0.4070 |

**Conclusion:** The benzoyl-substituted (**6**) and Boc-substituted (**5**, **12**) compounds exhibited similar r<sub>In-BTD</sub> (ca. 1.46 Å) to their acetylated counterpart (**4**, **11**). The torsional angle between the rings (θ<sub>In-BTD</sub>) increased from **6** to **5/12** to **4**.

The predicted vertical excitation energies (E) blue-shifts from **12** to **5/6** to **4**. In all cases, the predicted transitions originate from HOMOs (π\* combination of the BTD and indole/dimethylaniline fragments) and LUMOs (predominantly BTD-based) that are similar in composition, with minimal contribution from the carbonyl groups.

### 3.6 - Effects of larger *N*-substitution – Calculations for 7 and 8

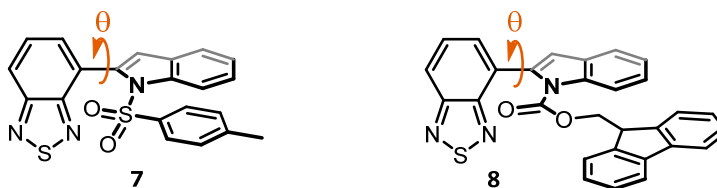

**Table S13:** Compound **7** modelled in various solvents.

| Solvent          | Lowest frequency (cm <sup>-1</sup> ) | r <sub>in-BTD</sub> (Å) | θ <sub>in-BTD</sub> (°) | λ (nm) | E (cm <sup>-1</sup> ) | f      |
|------------------|--------------------------------------|-------------------------|-------------------------|--------|-----------------------|--------|
| <i>n</i> -hexane | 17.3240                              | 1.4617                  | 49.8                    | 392.36 | 25487                 | 0.2137 |
| PhMe             | 17.7937                              | 1.4617                  | 49.7                    | 393.79 | 25394                 | 0.2239 |
| THF              | 17.8224                              | 1.4619                  | 49.6                    | 395.39 | 25291                 | 0.2066 |
| <i>i</i> PrOH    | 17.0317                              | 1.4620                  | 49.6                    | 396.14 | 25244                 | 0.2    |
| MeOH             | 17.0900                              | 1.4620                  | 49.6                    | 396.05 | 25249                 | 0.1937 |
| MeCN             | 17.0698                              | 1.4621                  | 49.6                    | 396.21 | 25239                 | 0.1954 |
| DMSO             | 17.1273                              | 1.4621                  | 49.6                    | 396.83 | 25200                 | 0.2019 |
| H <sub>2</sub> O | 15.7978                              | 1.4620                  | 49.6                    | 396.41 | 25226                 | 0.1932 |

**Table S14:** Compound **8** modelled in various solvents.

| Solvent          | Lowest frequency (cm <sup>-1</sup> ) | r <sub>in-BTD</sub> (Å) | θ <sub>in-BTD</sub> (°) | λ (nm) | E (cm <sup>-1</sup> ) | f      |
|------------------|--------------------------------------|-------------------------|-------------------------|--------|-----------------------|--------|
| <i>n</i> -hexane | 17.0335                              | 1.4623                  | 49.7                    | 402.2  | 24863                 | 0.1839 |
| PhMe             | 17.3593                              | 1.4624                  | 49.8                    | 403.17 | 24803                 | 0.1923 |
| THF              | 17.8595                              | 1.4627                  | 50.2                    | 403.28 | 24797                 | 0.1780 |
| <i>i</i> PrOH    | 17.6029                              | 1.4628                  | 50.3                    | 403.45 | 24786                 | 0.1735 |
| MeOH             | 17.4638                              | 1.4628                  | 50.3                    | 403.21 | 24801                 | 0.1685 |
| MeCN             | 17.4435                              | 1.4628                  | 50.3                    | 403.34 | 24793                 | 0.1699 |
| DMSO             | 17.3891                              | 1.4628                  | 50.3                    | 403.88 | 24760                 | 0.1761 |
| H <sub>2</sub> O | 17.3111                              | 1.4628                  | 50.3                    | 403.35 | 24792                 | 0.1685 |

**Conclusion:** The tosyl- (**7**) and Fmoc-substituted (**8**) compounds exhibited similar r<sub>in-BTD</sub> (ca. 1.46 Å) to counterparts bearing acyl protecting groups (**4-6**, **11-12**). In both cases the torsional angle between the rings (θ<sub>in-BTD</sub>) increased sharply to ca. 50°. The predicted vertical excitation energies (E) are similar to the above-mentioned derivatives, with a noticeable blue-shift for tosylated compound **7**. In all cases, the predicted transitions originate from HOMOs (π\* combination of the BTD and indole/dimethylaniline fragments) and LUMOs (predominantly BTD-based) that are similar in composition.

## VI – References

1. Fulmer, G. R.; Miller, A. J. M.; Sherden, N. H.; Gottlieb, H. E.; Nudelman, A.; Stoltz, B. M.; Bercaw, J. E.; Goldberg, K. I. *Organometallics* **2010**, *29*, 2176.
2. Sjöback, R.; Nygren, J.; Kubista, M. *Spectrochim. Acta Part A*. **1995**, *51*, L7.
3. Brouwer, A. M. *Pure Appl. Chem.* **2011**, *83*, 2213.
4. Kozma, I. Z.; Krok, P.; Riedle, E. *J. Opt. Soc. Am. B* **2005**, *22*, 1479.
5. Moutzouris, K.; Papamichael, M.; Betsis, S. C.; Stavarakas, I.; Hloupis, G.; Triantis, D. *Appl. Phys. B*. **2014**, *116*, 617.
6. Kedenburg, S.; Vieweg, M.; Gissibl, T.; Giessen, H. *Opt. Mater. Express* **2012**, *2*, 1588.
7. H. Liu, L. Wang, M. Lv, R. Pei, P. Li, Z. Pei, Y. Wang, W. Su, X.-Q. Xie, *J. Chem. Inf. Model.*, **2014**, *54*, 1050-1060.
8. Appelqvist, H.; Stranius, K.; Börjesson, K.; Nilsson, K. P. R.; Dyrager, C. *Bioconjugate Chem.* **2017**, *28*, 1363.
9. Ito, S.; Yamada, T.; Taguchi, T.; Yamaguchi, Y.; Asami, M. *Chem. Asian J.* **2016**, *11*, 1963.
10. Kato, S.-i.; Matsumoto, T.; Shigeiwa, M.; Gorohmaru, H.; Maeda, S.; Ishi-i, T.; Mataka, S. *Chem. Eur. J.* **2006**, *12*, 2303.
11. Frisch, M. J.; Trucks, G. W.; Schlegel, H. B.; Scuseria, G. E.; Robb, M. A.; Cheeseman, J. R.; Scalmani, G.; Barone, V.; Mennucci, B.; Petersson, G. A.; Nakatsuji, H.; Caricato, M.; Li, X.; Hratchian, H. P.; Izmaylov, A. F.; Bloino, J.; Zheng, G.; Sonnenberg, J. L.; Hada, M.; Ehara, M.; Toyota, K.; Fukuda, R.; Hasegawa, J.; Ishida, M.; Nakajima, T.; Honda, Y.; Kitao, O.; Nakai, H.; Vreven, T.; Montgomery, J. A., Jr.; Peralta, J. E.; Ogliaro, F.; Bearpark, M.; Heyd, J. J.; Brothers, E.; Kudin, K. N.; Staroverov, V. N.; Kobayashi, R.; Normand, J.; Raghavachari, K.; Rendell, A.; Burant, J. C.; Iyengar, S. S.; Tomasi, J.; Cossi, M.; Rega, N.; Millam, J. M.; Klene, M.; Knox, J. E.; Cross, J. B.; Bakken, V.; Adamo, C.; Jaramillo, J.; Gomperts, R.; Stratmann, R. E.; Yazyev, O.; Austin, A. J.; Cammi, R.; Pomelli, C.; Ochterski, J. W.; Martin, R. L.; Morokuma, K.; Zakrzewski, V. G.; Voth, G. A.; Salvador, P.; Dannenberg, J. J.; Dapprich, S.; Daniels, A. D.; Farkas, Ö.; Foresman, J. B.; V. Ortiz, J.; Cioslowski, J.; Fox, D. J. Gaussian 16, revision A.03; Gaussian, Inc.: Wallingford, CT, 2009
12. Cossi, M.; Scalmani, G.; Rega, N.; Barone, V. *J. Chem. Phys.*, **2002**, *117*, 43
13. Petersson, G. A.; Al-Laham, M. A. *J. Chem. Phys.*, **1991**, *94*, 6081.
14. Francl, M. M.; Pietro, W. J.; Hehre, W. J.; Binkley, J. S.; Gordon, M. S.; DeFree, D. J.; Pople, J. A. *J. Chem. Phys.*, **1982**, *77*, 3654.
15. Hariharan, P. C.; Pople, J. A. *Theor. Chim. Acta* **1973**, *28*, 213.
16. Barnsley, J. E., Shillito, G. E., Larsen, C. B., van der Salm, H., Wang, L. E., Lucas, N. T., Gordon, K. C. *J. Phys. Chem. A*, **2016**, *120*, 1853 – 1866.

## VII – NMR spectra of new compounds

$^1\text{H}$  NMR (400 MHz,  $\text{CDCl}_3$ ) of compound **2**

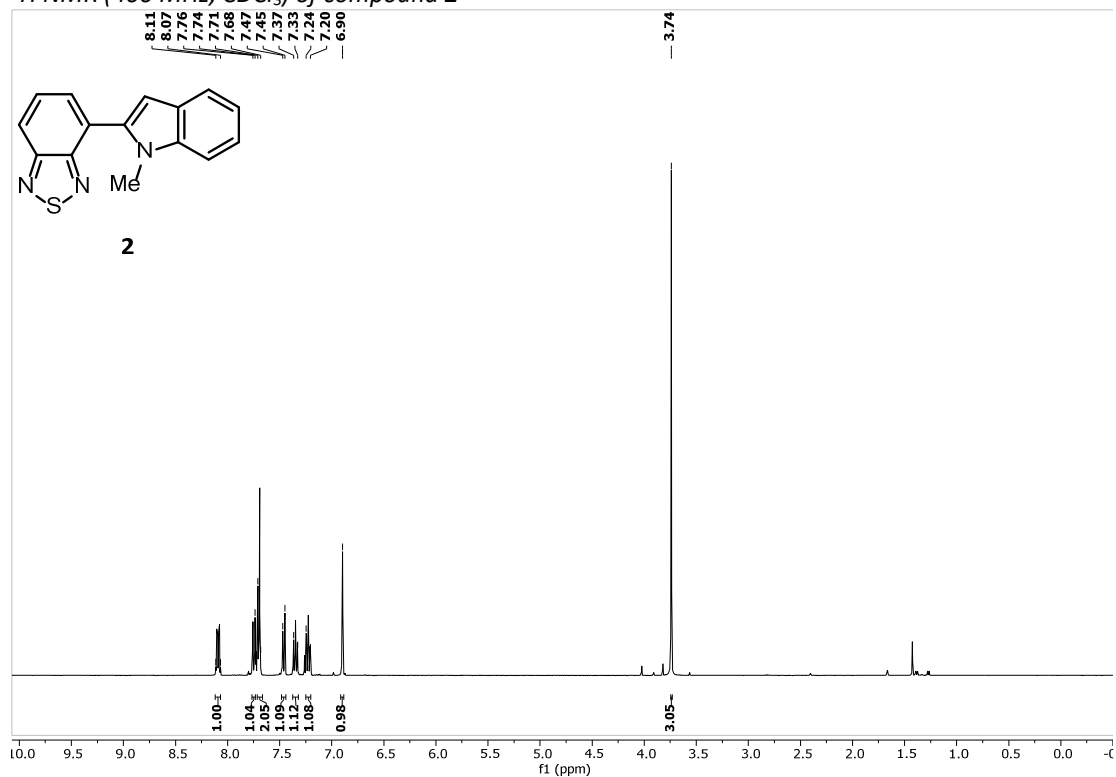

$^{13}\text{C}$  NMR (101 MHz,  $\text{CDCl}_3$ ) of compound **2**

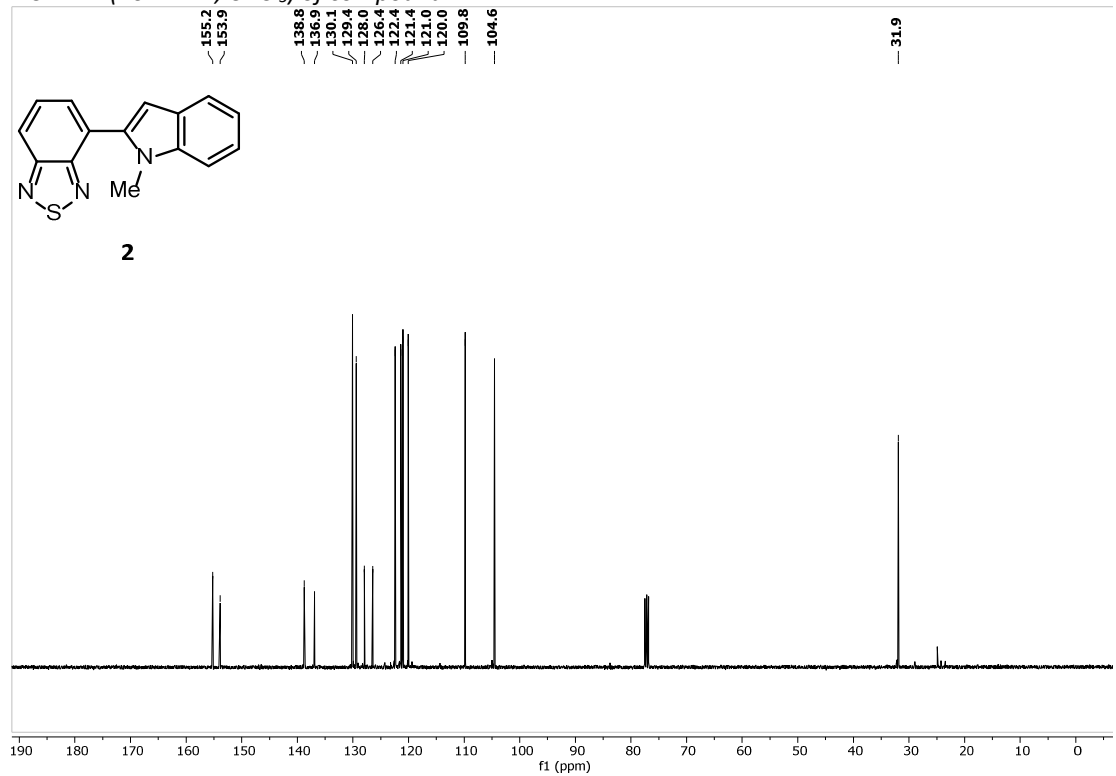

<sup>1</sup>H NMR (400 MHz, CDCl<sub>3</sub>) of compound **3**

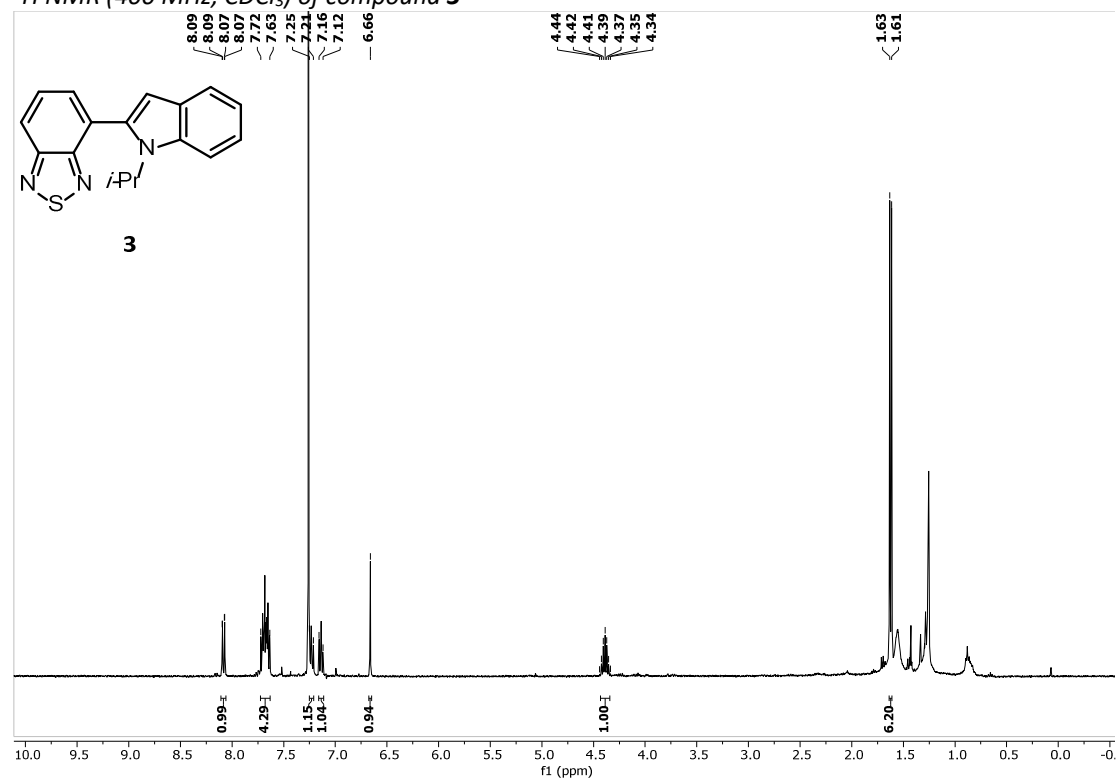

<sup>13</sup>C NMR (101 MHz, CDCl<sub>3</sub>) of compound **3**

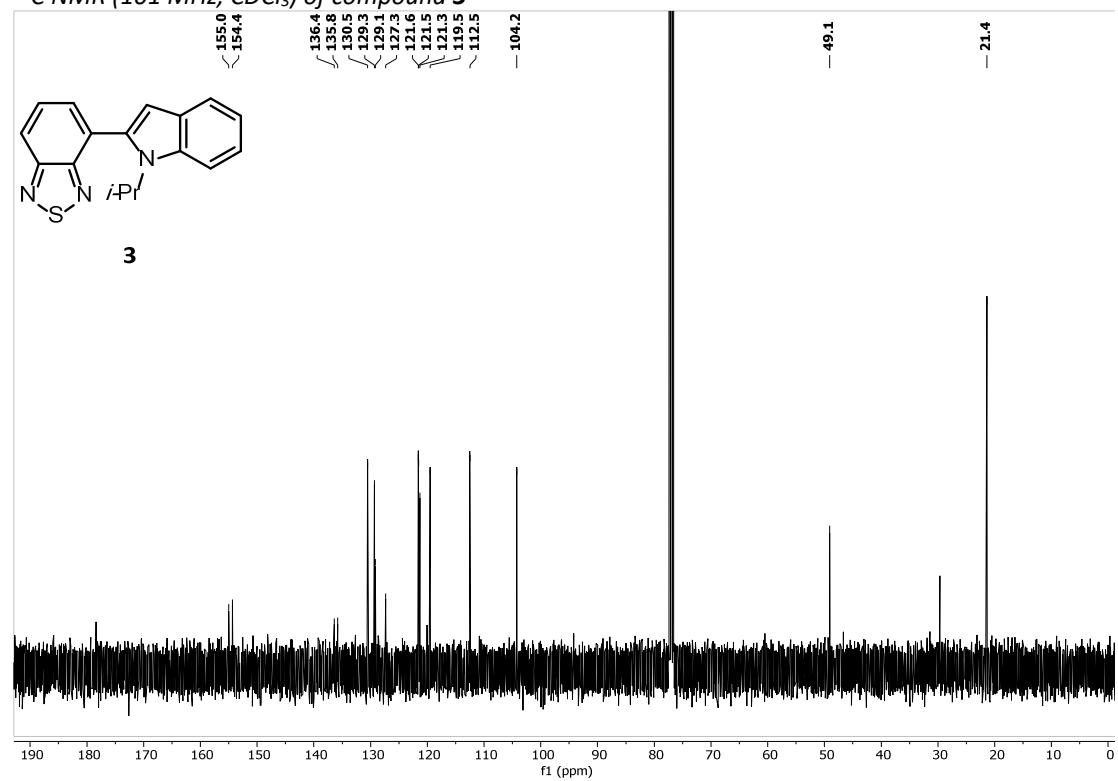

<sup>1</sup>H NMR (400 MHz, CDCl<sub>3</sub>) of compound **4**

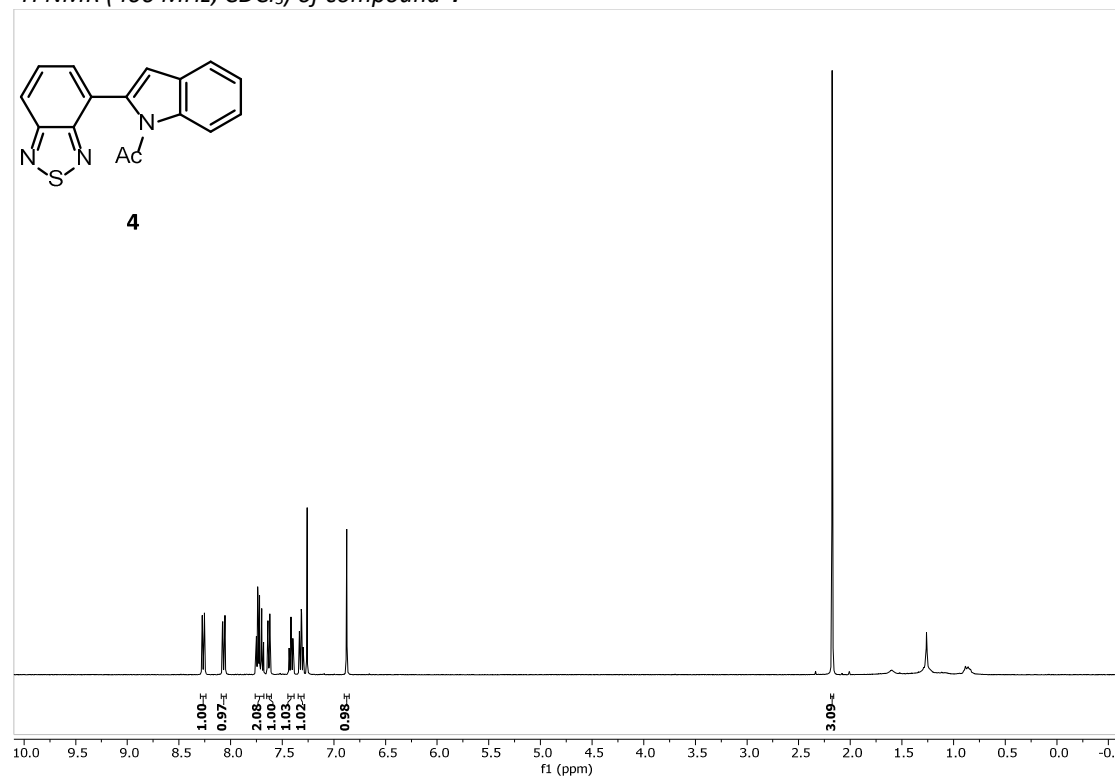

<sup>13</sup>C NMR (101 MHz, CDCl<sub>3</sub>) of compound **4**

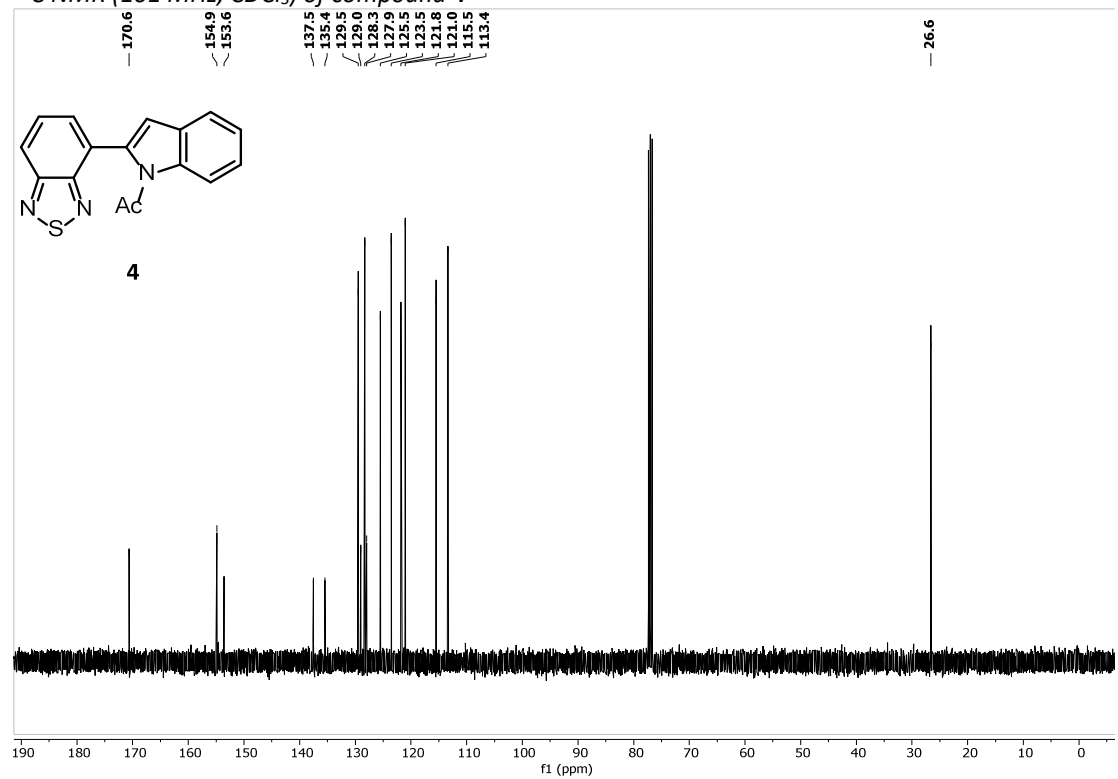

<sup>1</sup>H NMR (400 MHz, CDCl<sub>3</sub>) of compound 6

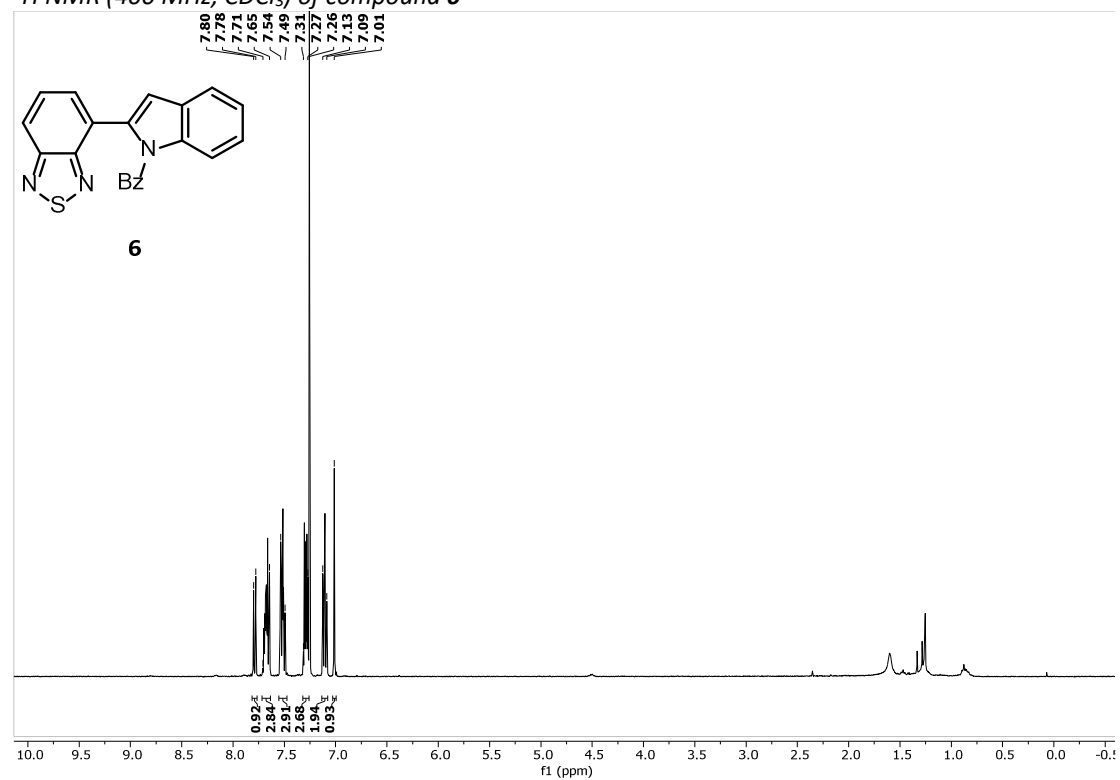

<sup>13</sup>C NMR (101 MHz, CDCl<sub>3</sub>) of compound 6

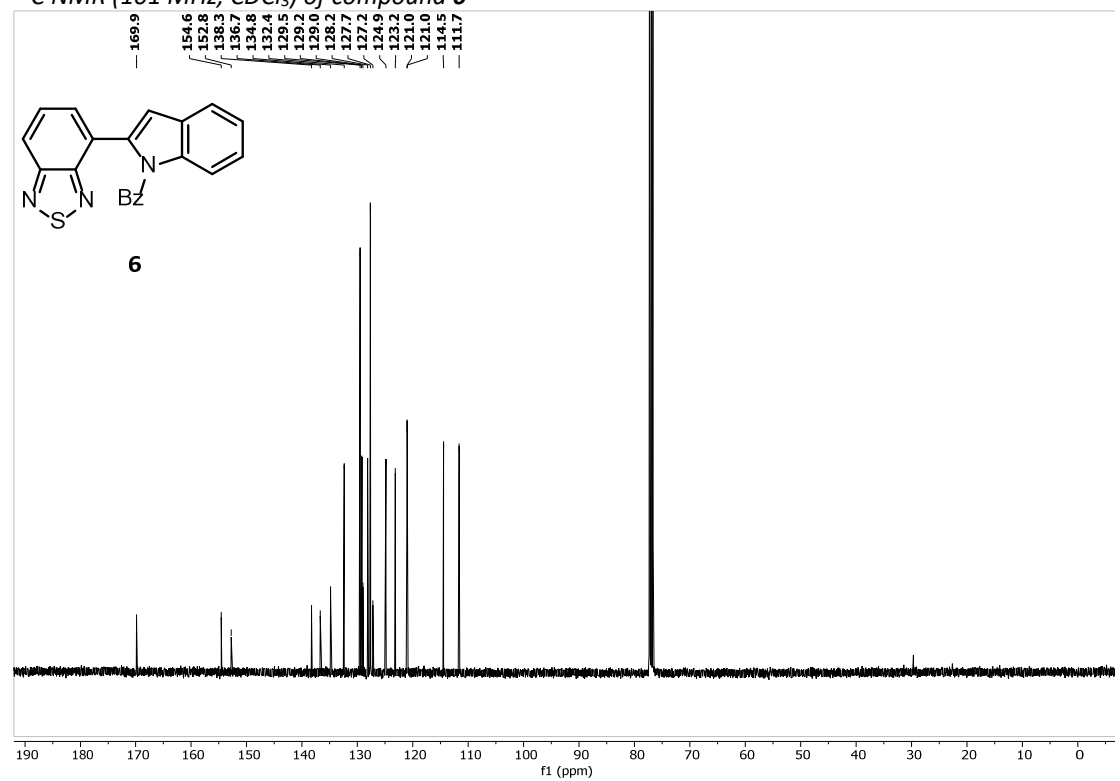



<sup>1</sup>H NMR (400 MHz, CDCl<sub>3</sub>) of compound **7**

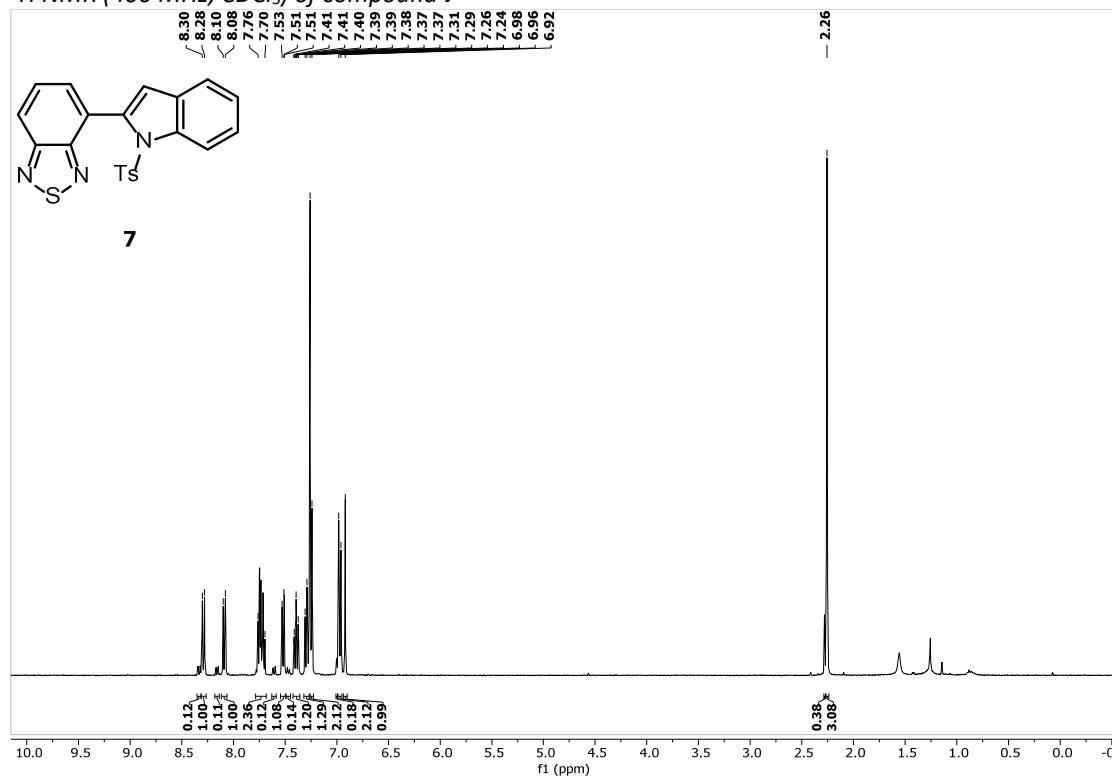

<sup>13</sup>C NMR (101 MHz, CDCl<sub>3</sub>) of compound **7**

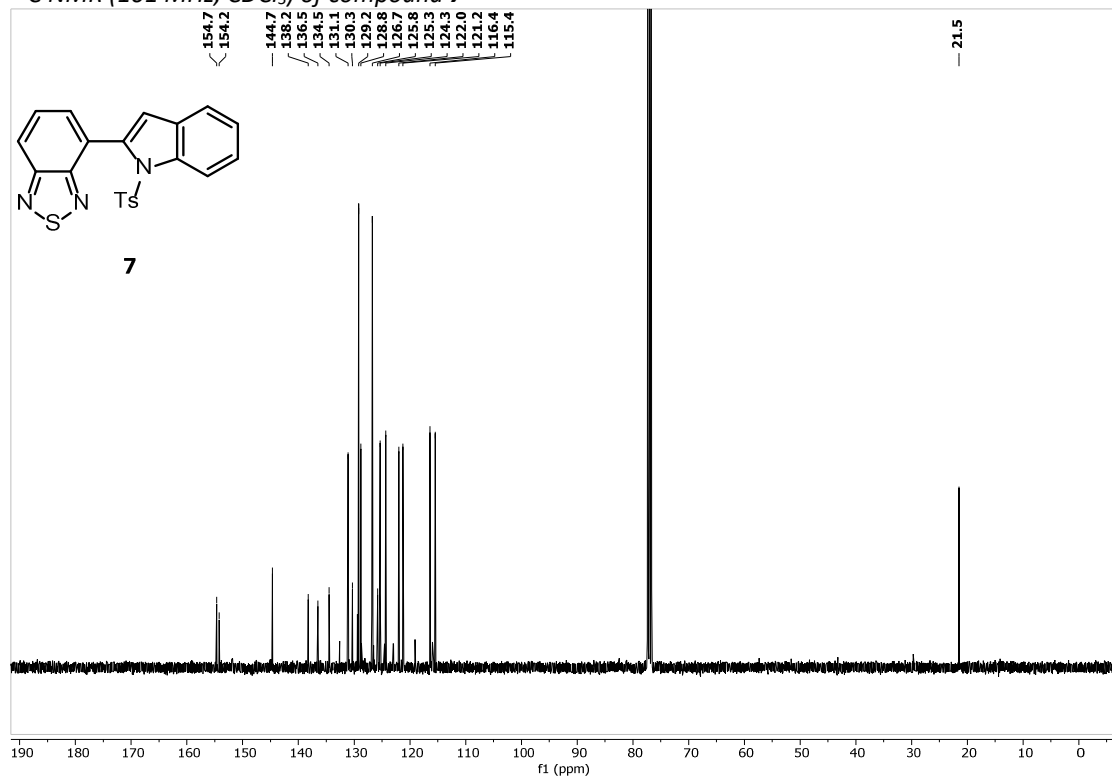

<sup>1</sup>H NMR (400 MHz, CDCl<sub>3</sub>) of compound **8**

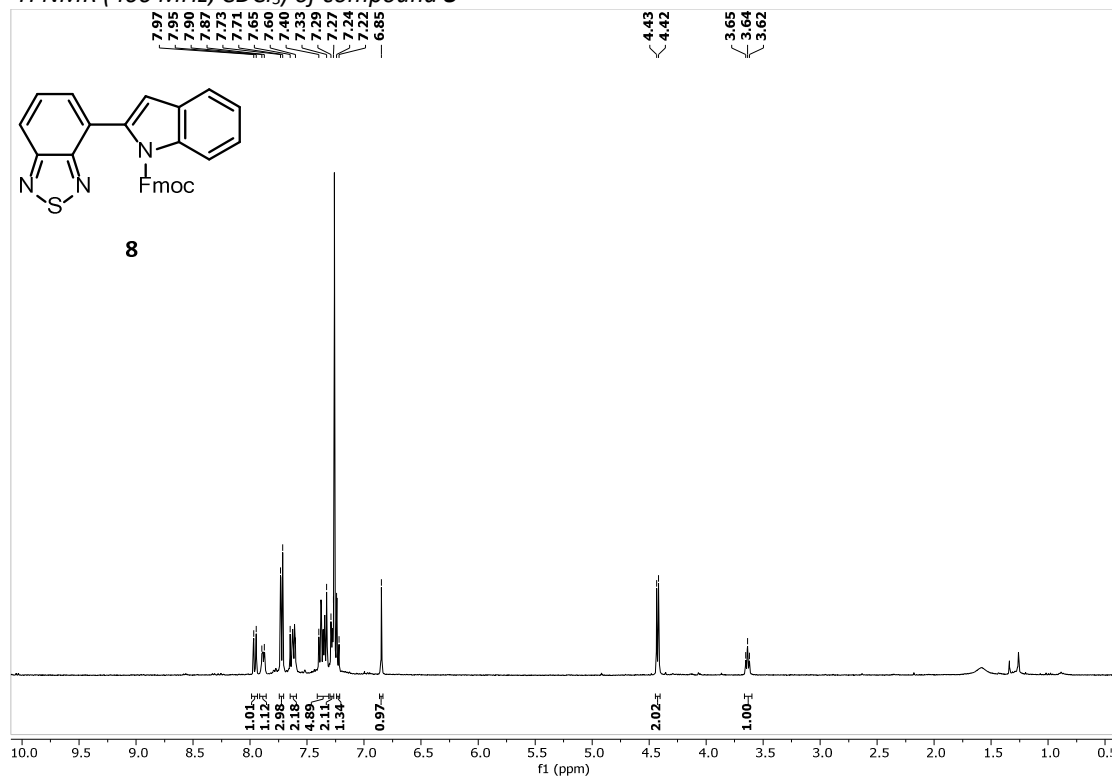

<sup>13</sup>C NMR (101 MHz, CDCl<sub>3</sub>) of compound **8**

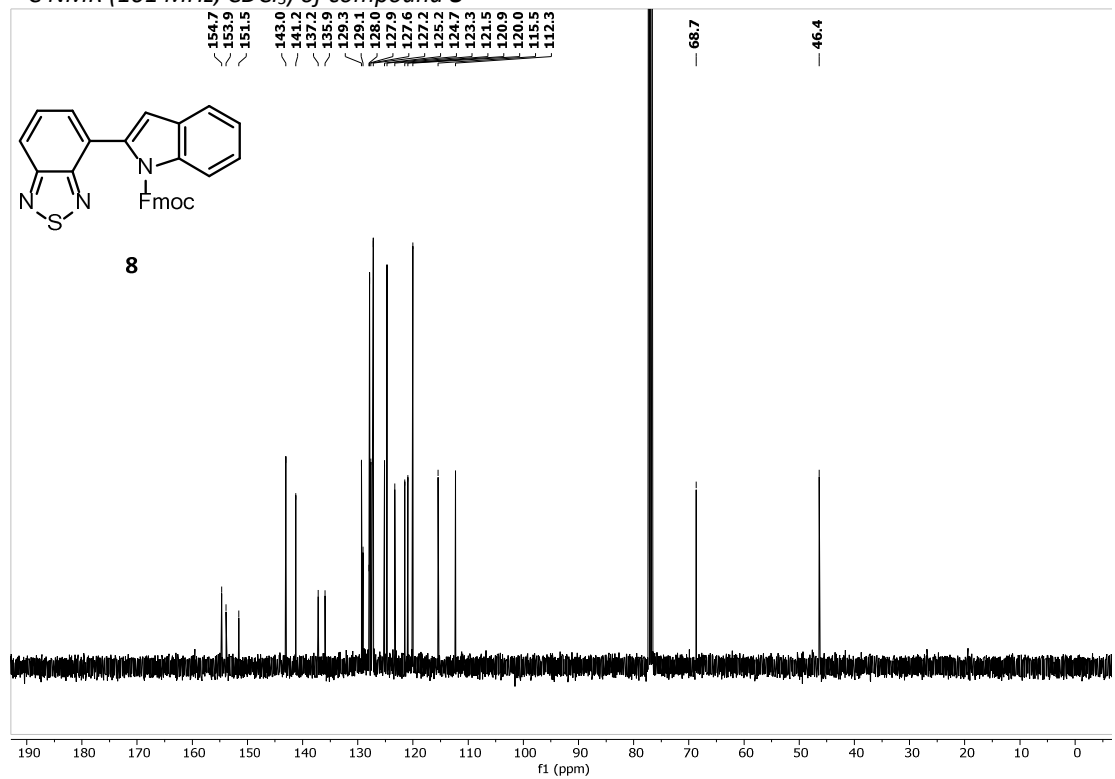

<sup>1</sup>H NMR (400 MHz, CDCl<sub>3</sub>) of compound **9**

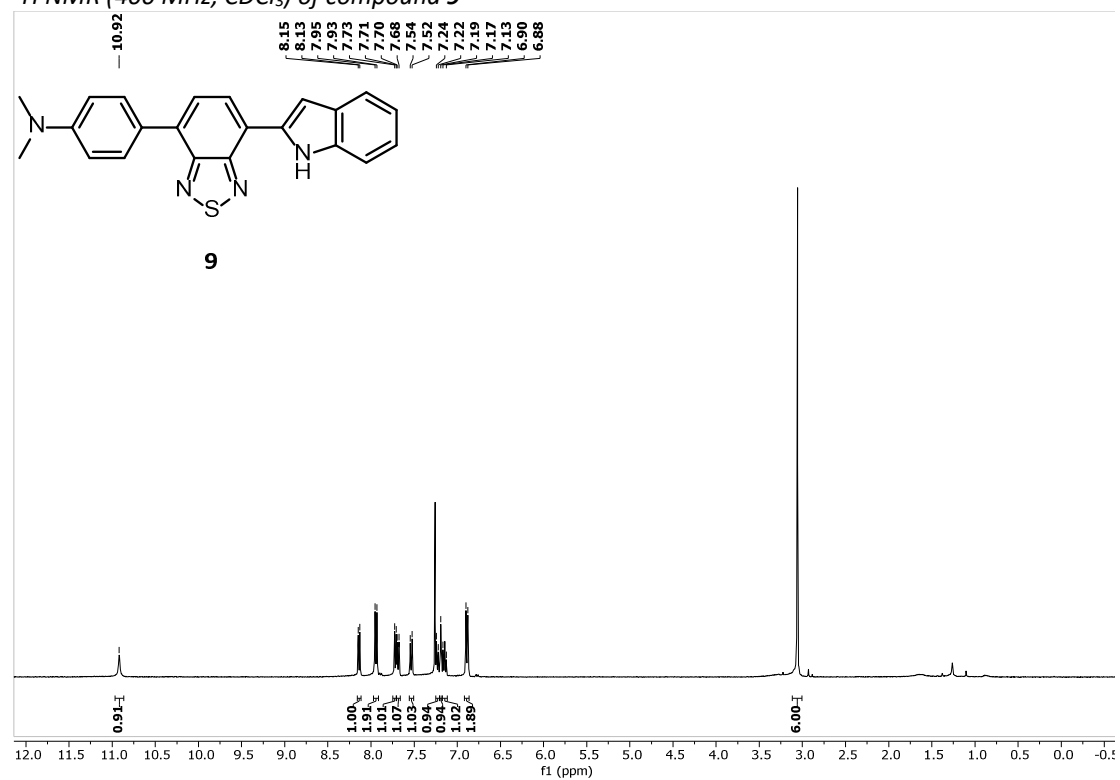

<sup>13</sup>C NMR (101 MHz, CDCl<sub>3</sub>) of compound **9**

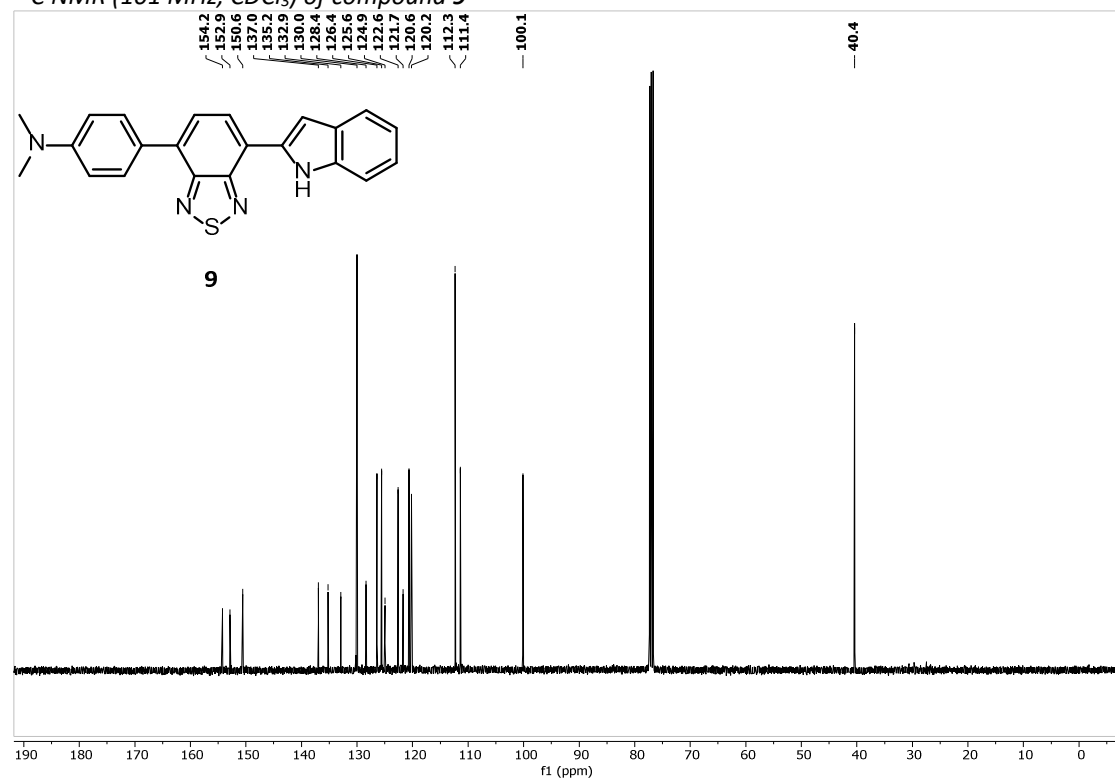

<sup>1</sup>H NMR (400 MHz, CDCl<sub>3</sub>) of compound **10**

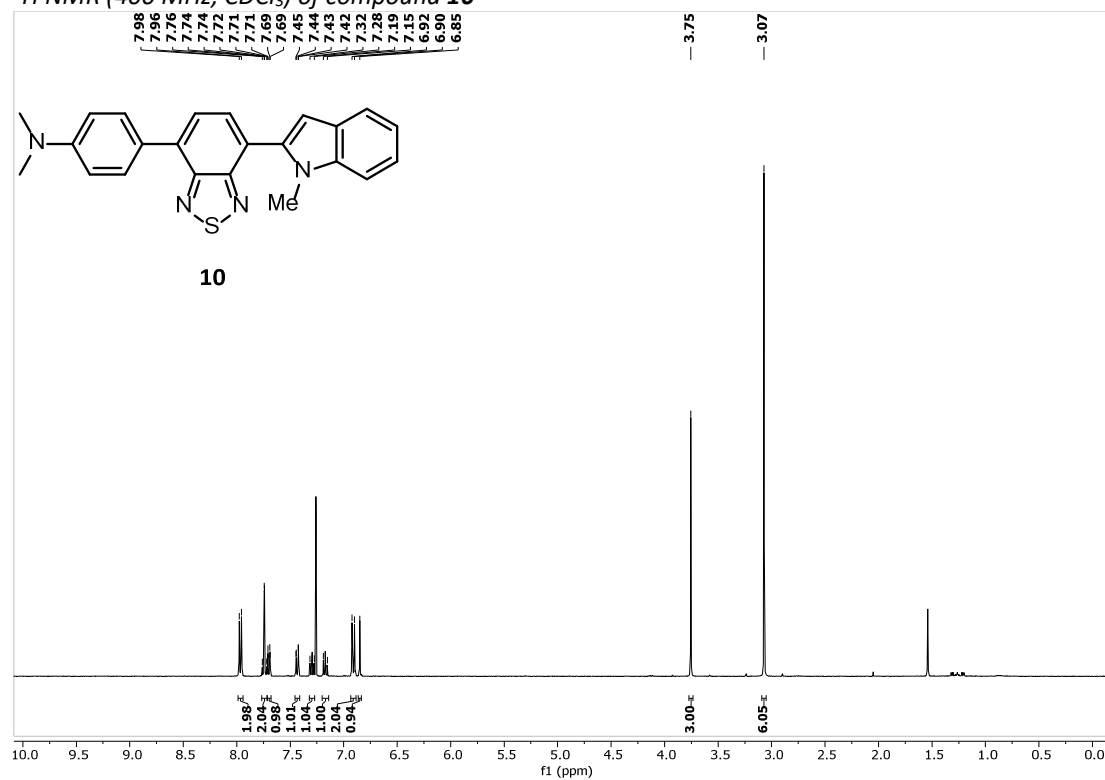

<sup>13</sup>C NMR (101 MHz, CDCl<sub>3</sub>) of compound **10**

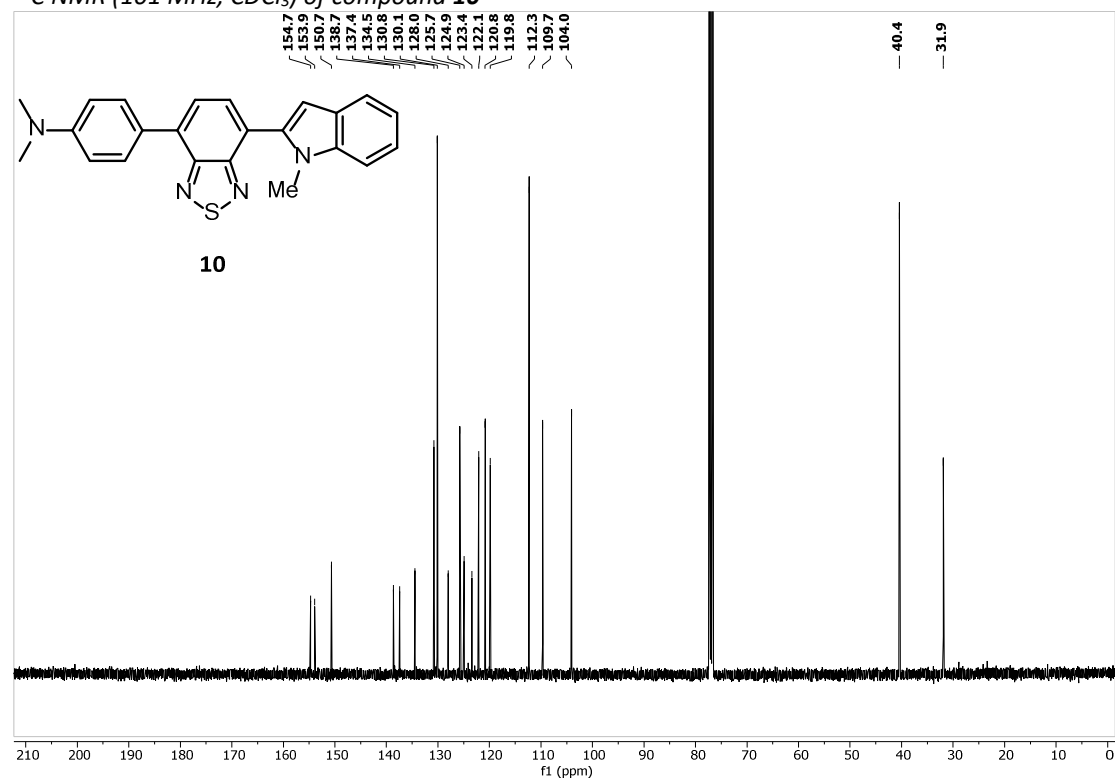

$^1\text{H}$  NMR (400 MHz,  $\text{CDCl}_3$ ) of compound **11**

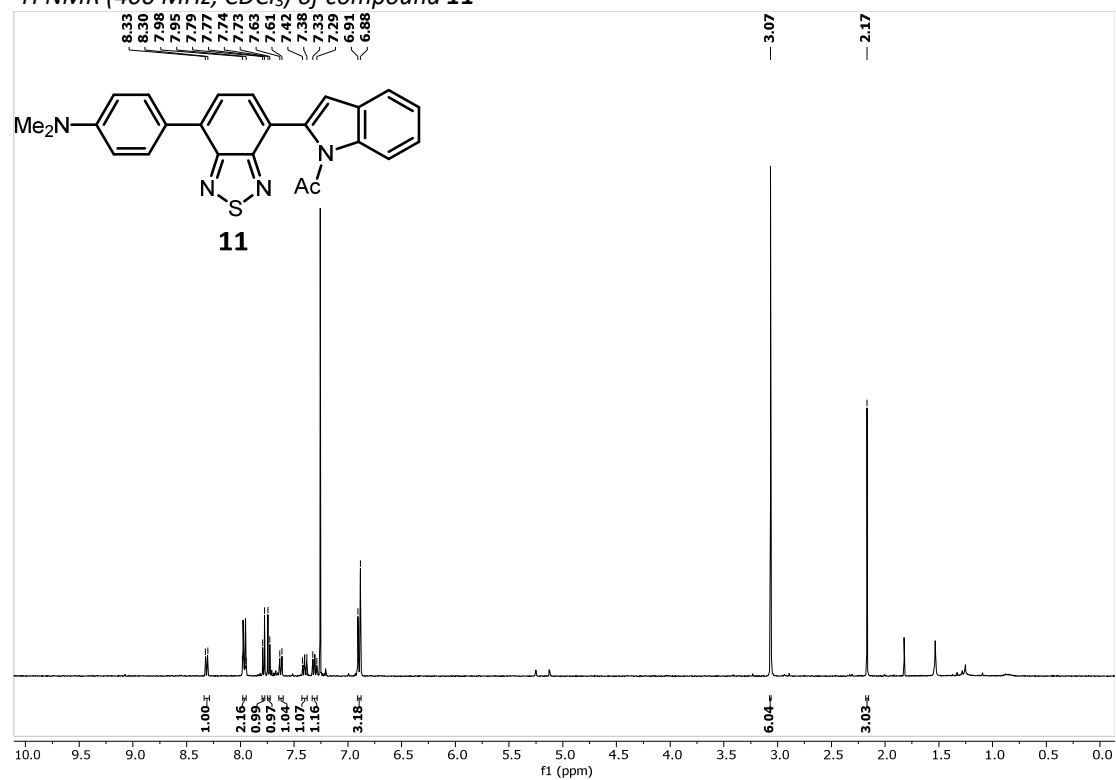

$^{13}\text{C}$  NMR (101 MHz,  $\text{CDCl}_3$ ) of compound **11**

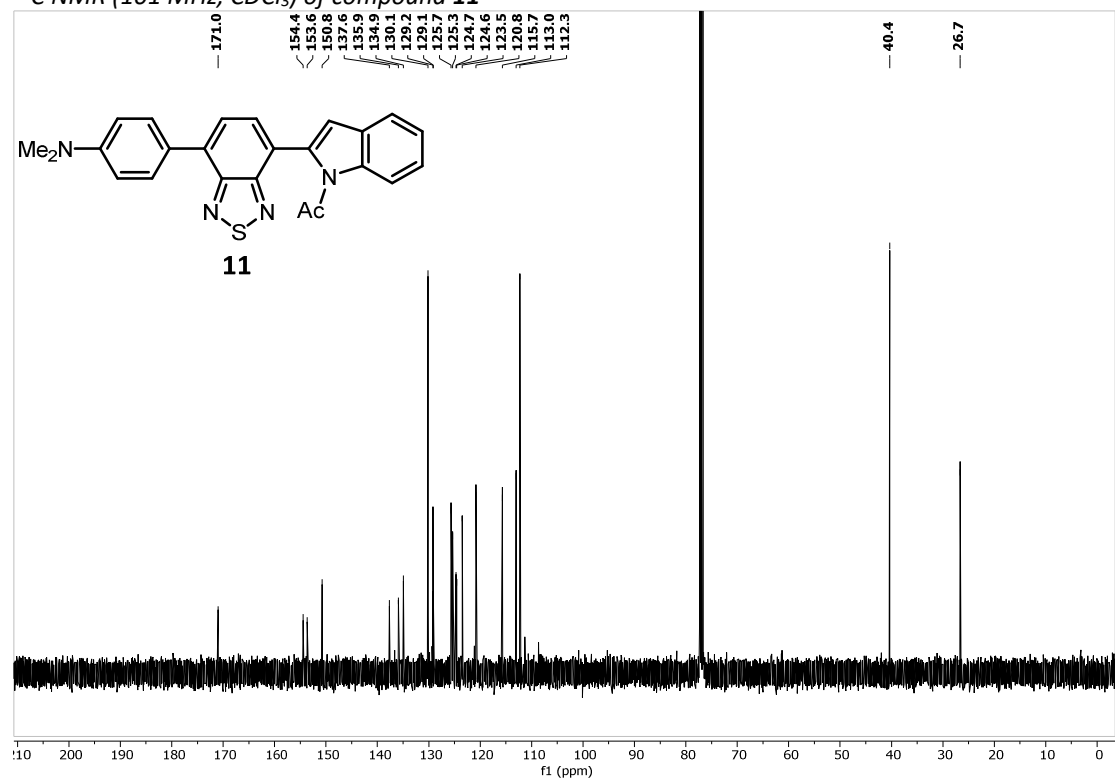

<sup>1</sup>H NMR (400 MHz, CDCl<sub>3</sub>) of compound **12**

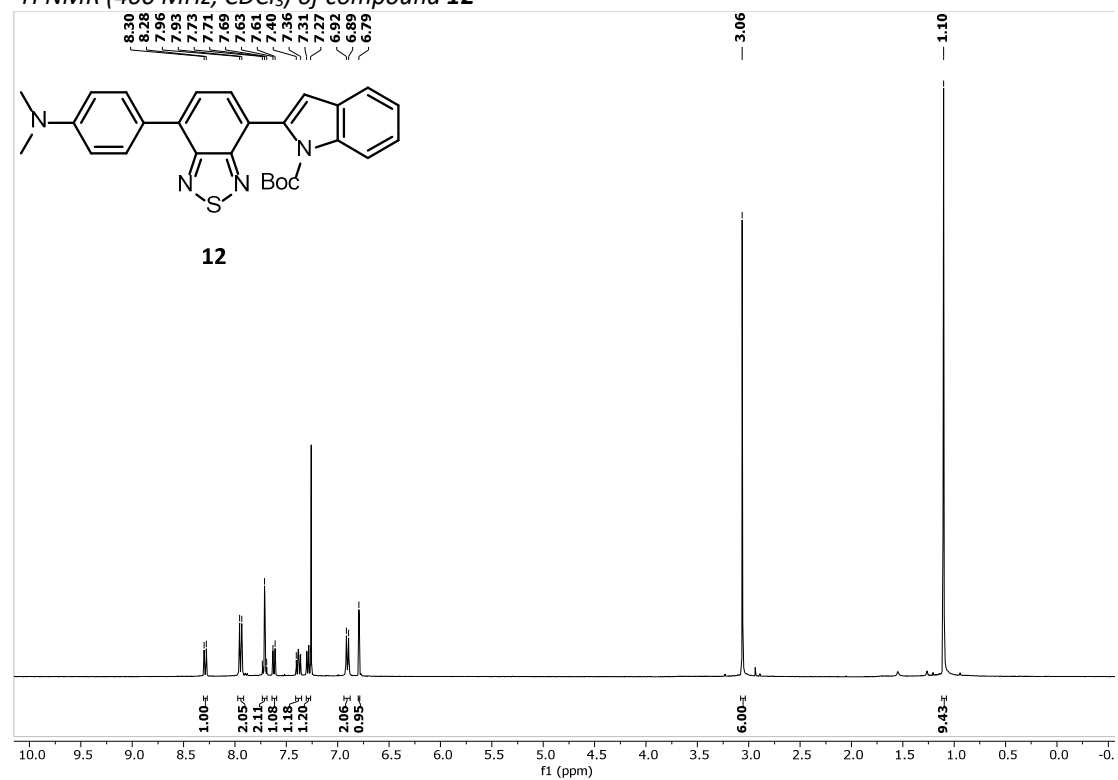

<sup>13</sup>C NMR (101 MHz, CDCl<sub>3</sub>) of compound **12**

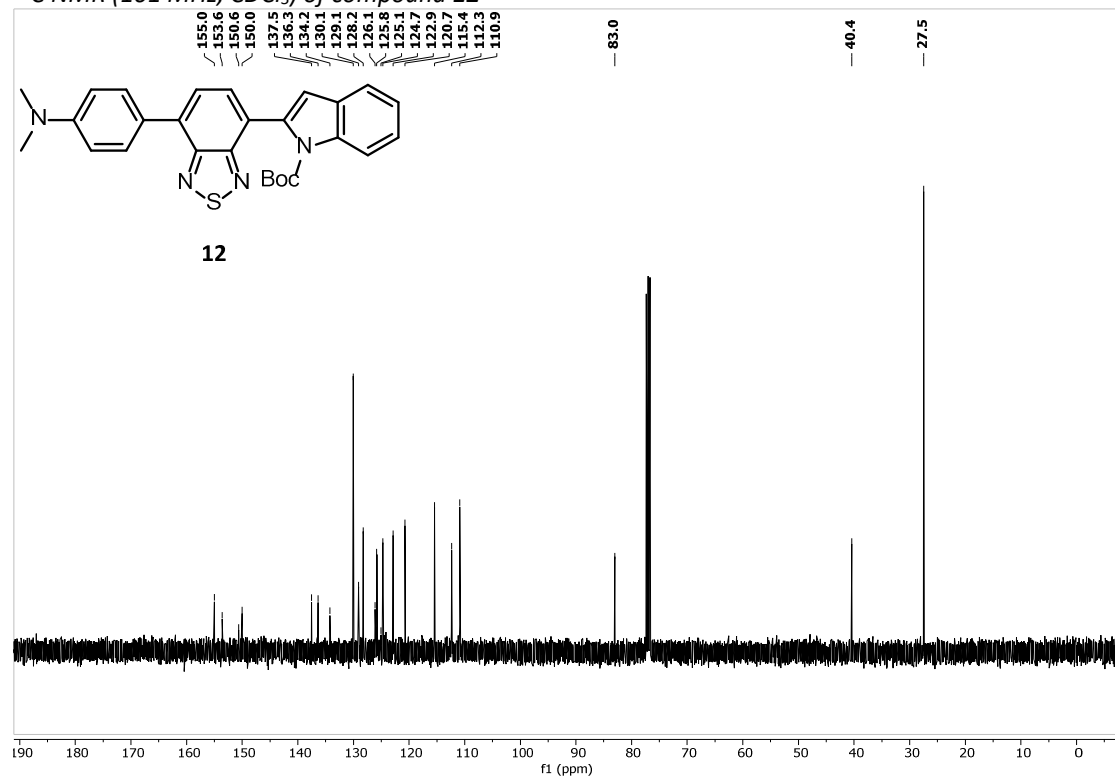

Supplement: d1ra04419b1.pdf [file d1ra04419b1.pdf]
